1 **Title: Neural entrainment is strongest to the spectral flux of slow music and**  
2 **depends on familiarity and beat salience**

3

4 **Authors:** Kristin Weineck<sup>1,2</sup>, Olivia Xin Wen<sup>1</sup>, Molly J. Henry<sup>1,3</sup>

5

6 <sup>1</sup>Research Group “Neural and Environmental Rhythms”

7 Max Planck Institute for Empirical Aesthetics

8 Grüneburgweg 14

9 60322 Frankfurt am Main, Germany

10

11 <sup>2</sup>Institute for Cell Biology and Neuroscience

12 Goethe University Frankfurt am Main

13 Max-von-Laue-Str. 13

14 60438, Frankfurt am Main, Germany

15

16 <sup>3</sup>Department of Psychology

17 Ryerson University

18 350 Victoria Street

19 Toronto, Ontario, Canada M5B 2K3

20

21 \* Author to whom correspondence should be addressed. Electronic mail:

22 [kristin.weineck@ae.mpg.de](mailto:kristin.weineck@ae.mpg.de)

23 [molly.henry@ae.mpg.de](mailto:molly.henry@ae.mpg.de)

24

25 **Abstract**

26 Neural activity in the auditory system synchronizes to sound rhythms, and brain–  
27 environment synchronization is thought to be fundamental to successful auditory perception.  
28 Sound rhythms are often operationalized in terms of the sound’s amplitude envelope. We  
29 hypothesized that – especially for music – the envelope might not best capture the complex  
30 spectro-temporal fluctuations that give rise to beat perception and synchronize neural activity.  
31 This study investigated 1) neural entrainment to different musical features, 2) tempo-  
32 dependence of neural entrainment, and 3) dependence of entrainment on familiarity,  
33 enjoyment, and ease of beat perception. In this electroencephalography study, 37 human  
34 participants listened to tempo-modulated music (1–4 Hz). Independent of whether the analysis  
35 approach was based on temporal response functions (TRFs) or reliable components analysis  
36 (RCA), the spectral flux of music – as opposed to the amplitude envelope – evoked strongest  
37 neural entrainment. Moreover, music with slower beat rates, high familiarity, and easy-to-  
38 perceive beats elicited the strongest neural response. Based on the TRFs, we could decode  
39 music stimulation tempo, but also perceived beat rate, even when the two differed. Our results  
40 demonstrate the importance of accurately characterizing musical acoustics in the context of  
41 studying neural entrainment, and demonstrate entrainment’s sensitivity to musical tempo,  
42 familiarity, and beat salience.

43

## 44 **Introduction**

45 Neural activity synchronizes to different types of rhythmic sounds, such as speech and music  
46 (Doelling and Poeppel, 2015, Nicolaou et al., 2017, Ding et al., 2017, Kösem et al., 2018),  
47 over a wide range of rates. Neural oscillations are involved in the regulation of  
48 (patho-)physiological activity and are important for gating input during sensory perception  
49 and temporal processing (Giraud and Poeppel, 2012, Henry and Herrmann, 2014). For this  
50 reason, bringing neural oscillations into temporal alignment with a rhythmic stimulus – *neural*  
51 *entrainment* – can influence perception in the auditory, visual, and somatosensory modalities  
52 (Henry and Obleser, 2012, Spaak et al., 2014, Gundlach et al., 2016). In the auditory domain,  
53 neural oscillations entrained at syllabic, prosodic, and semantic rates in speech seem to play  
54 an important role in speech perception and intelligibility (Doelling et al., 2014, Peelle et al.,  
55 2013, Kösem et al., 2018). The current study examined neural entrainment to music.

56 Music is highly rhythmic, and neural oscillations can be entrained by the beat, the  
57 most prominent isochronous pulse in music, to which listeners would sway their bodies or tap  
58 their feet (Tierney and Kraus, 2015, Nozaradan et al., 2012, Large and Snyder, 2009, Doelling  
59 and Poeppel, 2015). Most studies that have examined cortical tracking of musical rhythm used  
60 simplified musical stimuli, such as MIDI melodies or click tracks (Kumagai et al., 2018,  
61 Nozaradan et al., 2012, Di Liberto et al., 2020, Nozaradan et al., 2011, Wollman et al., 2020)  
62 or monophonic melodies (Doelling and Poeppel, 2015); only a few studies have focused on  
63 naturalistic, polyphonic music (Tierney and Kraus, 2015, Madsen et al., 2019, Kaneshiro et  
64 al., 2020). Listeners show a strong preference for music at beat rates around 2 Hz (here, we  
65 use the term *tempo* to refer to the beat rate). The preference for 2 Hz coincides with the modal  
66 tempo of Western pop music (Moelants, 2002) and the most prominent frequency of natural  
67 adult body movements (MacDougall and Moore, 2005). Indeed, previous research showed  
68 that listeners perceive rhythmic sequences at beat rates around 2 Hz especially salient when  
69 they are able to track the beat by moving their bodies (Zalta et al., 2020). Despite the

70 perceptual and motor evidence, studies looking at tempo-dependence of neural entrainment  
71 are scarce (Doelling and Poeppel, 2015, Nicolaou et al., 2017) and we are not aware of any  
72 study using naturalistic polyphonic musical stimuli that are tempo-modulated. By examining  
73 entrainment across a relatively wide and finely spaced range of musical tempi (1–4 Hz,  
74 corresponding to the neural  $\delta$  band), we aimed to test whether the preference for music with  
75 beat rates around 2 Hz is reflected in the strength of neural entrainment. In addition, a number  
76 of different musical, behavioral, and perceptual measures have been shown to modulate  
77 neural entrainment and influence music perception, including complexity, familiarity,  
78 repetition of the music, musical training of the listener, and attention to the stimulus  
79 (Kumagai et al., 2018, Madsen et al., 2019, Doelling and Poeppel, 2015). Thus, we  
80 investigated the effects of enjoyment, familiarity and the ease of beat perception on neural  
81 entrainment.

82         Most studies assessing neural entrainment to music have examined entrainment to  
83 either the stimulus amplitude envelope, which quantifies intensity fluctuations over time  
84 (Doelling and Poeppel, 2015, Kaneshiro et al., 2020, Wollman et al., 2020), or “higher order”  
85 musical features such as surprise and expectation (Di Liberto et al., 2020). This mimics  
86 approaches used for studying neural tracking of speech, where neural activity has been shown  
87 to be entrained by the amplitude envelope (Peelle and Davis, 2012), which roughly  
88 corresponds to syllabic fluctuations (Doelling et al., 2014), as well as by “higher order”  
89 semantic information (Broderick et al., 2019). “Higher order” musical features are difficult to  
90 compute for naturalistic music, which is typically polyphonic and has complex spectro-  
91 temporal properties (Zatorre et al., 2002). However, amplitude-envelope entrainment is well  
92 documented: neural activity synchronizes to the amplitude fluctuations in music between 1 Hz  
93 and 8 Hz, and entrainment is especially strong for listeners with musical expertise (Doelling  
94 and Poeppel, 2015).

95           Because of the complex nature of natural polyphonic music, we hypothesized that  
96 amplitude envelope might not be the only or most dominant feature by which neural activity  
97 would be entrained (Miller, 2015). Thus, the current study investigated neural responses to  
98 different musical features that evolve over time and capture different aspects of the stimulus  
99 dynamics. Here, we use the term *musical feature* to refer to time-varying aspects of music that  
100 fluctuate on time scales corresponding roughly to the neural  $\delta$  band, as opposed to elements of  
101 music such as key, harmony or syncopation. We examined amplitude envelope, the first  
102 derivative of the amplitude envelope (usually more sensitive to sound onsets than the  
103 amplitude envelope), beat times, and *spectral flux*, which describes spectral changes of the  
104 signal on a frame-to-frame basis by computing the difference between the spectral vectors of  
105 subsequent frames (Miller, 2015). One distinct advantage of spectral flux over the envelope or  
106 its derivative is that spectral flux is sensitive to rhythmic information that is communicated by  
107 changes in pitch even when they are not accompanied by changes in amplitude.

108           The current study investigated neural entrainment to natural music by using two  
109 different analysis approaches: Reliable Components Analysis (RCA) (Kaneshiro et al., 2020)  
110 and temporal response functions (TRFs) (Di Liberto et al., 2020). RCA typically relies on  
111 stimulus–response correlation or stimulus–response coherence (Kaneshiro et al., 2020). These  
112 approaches have been criticized because of their potential susceptibility to autocorrelation,  
113 which is argued to be minimized in the TRF approach (Zuk et al., 2021). Thus, we tested the  
114 agreement between these two analysis approaches.

115           We aimed to answer four questions. 1) Does neural entrainment to natural music  
116 depend on tempo? 2) Which musical feature shows the strongest neural entrainment during  
117 natural music listening? 3) How compatible are RCA- and TRF-based methods with  
118 quantifying neural entrainment to natural music? 4) How do enjoyment, familiarity, and ease  
119 of beat perception affect neural entrainment? To answer these research questions, we recorded  
120 electroencephalography (EEG) data while participants listened to instrumental music

121 presented at different tempi (1–4 Hz). Strongest neural entrainment was observed in response  
122 to the spectral flux of music, for tempi between 1–2 Hz, to familiar songs, and to songs with  
123 an easy-to-perceive beat. Moreover, a classifier trained on the neural responses to each  
124 musical feature predicted the metrical level at which listeners tapped the beat. This indicates  
125 that the brain responded to *perceived* tempo, even when it was different from the stimulus  
126 tempo.

127

## 128 **Results**

129 Scalp EEG activity of 37 human participants was measured while they listened to  
130 instrumental segments of natural music from different genres (Supplementary Table 1). Music  
131 segments were presented at thirteen parametrically varied tempi (1–4 Hz in 0.25-Hz steps; see  
132 *Materials and Methods*). We assessed neural entrainment to four different musical features:  
133 amplitude envelope, first derivative of the amplitude envelope, beat times, and spectral flux.  
134 Neural entrainment was quantified using two different analysis pipelines and compared: 1)  
135 RCA combined with time- and frequency-domain analyses, and 2) TRFs (Crosse et al., 2016,  
136 Kaneshiro et al., 2020). As different behavioral and perceptual measures have been shown to  
137 influence neural entrainment to music (Madsen et al., 2019, Cameron et al., 2019), we  
138 investigated the effects of enjoyment, familiarity, and the ease with which a beat was  
139 perceived (Fig. 1A). To be able to use a large variety of musical stimuli on the group level,  
140 and to decrease any effects that may have arisen from individual stimuli occurring at certain  
141 tempi but not others, participants were divided into four subgroups that listened to different  
142 pools of stimuli (for more details please see *Materials and Methods*). The subgroups' stimulus  
143 pools overlapped, but the individual song stimuli were presented at different tempi for each  
144 subgroup.

145 *Musical features*

146 We examined neural synchronization to the time courses of four different musical features  
147 (Fig. 1B). First, we quantified energy fluctuations over time as the gammatone-filtered  
148 amplitude envelope (we report analyses on the full-band envelope in Supplementary Figures 2  
149 and 4). Second, we computed the half-wave-rectified first derivative of the amplitude  
150 envelope, which is typically considered to be sensitive to the presence of onsets in the  
151 stimulus (Bello et al., 2005). Third, a percussionist drummed along with the musical segments  
152 to define beat times, which were here treated in a binary manner. Fourth, a spectral novelty  
153 function, referred to as spectral flux (Miller, 2015), was computed to capture changes in  
154 frequency content (as opposed to amplitude fluctuations) over time. In contrast to the first  
155 derivative, the spectral flux is better able to identify note onsets that are characterized by  
156 changes in spectral content (pitch or timbre), even if the energy level remains the same. To  
157 ensure that each musical feature possessed acoustic cues to the stimulation-tempo  
158 manipulation, we computed a fast Fourier transform (FFT) on the musical-feature time  
159 courses separately for each stimulation-tempo condition; the mean amplitude spectra are  
160 plotted in Figure 1C. Overall, amplitude peaks were observed at the intended stimulation  
161 tempo and at the harmonic rates for all stimulus features.

162 In order to assess the degree to which the different musical features might have been  
163 redundant, we calculated mutual information (MI) for all possible pairwise feature  
164 combinations and compared MI values to surrogate distributions calculated separately for  
165 each feature pair (Fig. 1D, E). MI quantifies the amount of information gained about one  
166 random variable by observing a second variable (Cover and Thomas, 2005). MI values were  
167 analyzed using separate three-way ANOVAs (MI data vs. MI surrogate  $\times$  Tempo  $\times$  Subgroup)  
168 for each musical feature. Spectral flux shared significant information with all other musical  
169 features; significant MI (relative to surrogate) was found between amplitude envelope and  
170 spectral flux ( $F(1,102)=24.68$ ,  $p_{FDR}=1.01e-5$ ,  $\eta^2=0.18$ ), derivative and spectral flux

171 (F(1,102)=82.3,  $p_{\text{FDR}}=1.92\text{e-}13$ ,  $\eta^2=0.45$ ) and beat times and spectral flux (F(1,102)=23.05,  
172  $p_{\text{FDR}}=1.3\text{e-}5$ ,  $\eta^2=0.13$ ). This demonstrates that spectral flux captures information from all  
173 three other musical features, and as such, we expected that spectral flux would be associated  
174 with strongest neural entrainment. Unsurprisingly, there was also significant shared  
175 information between the amplitude envelope and first derivative (F(1,102)=14.11,  
176  $p_{\text{FDR}}=4.67\text{e-}4$ ,  $\eta^2=0.09$ ; other comparisons: (F<sub>env-beat</sub>(1,102)=8.44,  $p_{\text{FDR}}=0.006$ ,  $\eta^2=0.07$ ; F<sub>der-</sub>  
177 <sub>beat</sub>(1,102)=6.06,  $p_{\text{FDR}}=0.016$ ,  $\eta^2=0.05$ ).

178 There was a main effect of Tempo on MI shared between the amplitude envelope and  
179 derivative (F(12,91)=4,  $p_{\text{FDR}}=0.0002$ ,  $\eta^2=0.32$ ) and the spectral flux and beat times  
180 (F(12,91)=5.48,  $p_{\text{FDR}}=4.35\text{e-}6$ ,  $\eta^2=0.37$ ) (Supplementary Fig. 1). This is likely due to the  
181 presence of slightly different songs in the different tempo conditions, as the effect of tempo  
182 on MI was unsystematic for both feature pairs (see *Materials and Methods* and  
183 Supplementary Table 1). MI for the remaining feature pairs did not differ significantly across  
184 tempi.

185 No significant differences in MI were observed between subgroups, despite the  
186 subgroups hearing slightly different pools of musical stimuli: (F<sub>env-der</sub>(3,100)=0.71,  $p_{\text{FDR}}=0.94$ ,  
187  $\eta^2=0.01$ ; F<sub>env-beat</sub>(3,100)=2.63,  $p_{\text{FDR}}=0.33$ ,  $\eta^2=0.07$ ; F<sub>env-spec</sub>(3,100)=0.3,  $p_{\text{FDR}}=0.94$ ,  $\eta^2=0.01$ ;  
188 F<sub>der-beat</sub>(3,100)=0.43,  $p_{\text{FDR}}=0.94$ ,  $\eta^2=0.01$ ; F<sub>der-spec</sub>(3,100)=0.46,  $p_{\text{FDR}}=0.94$ ,  $\eta^2=0.01$ ; F<sub>beat-</sub>  
189 <sub>spec</sub>(3,100)=0.13,  $p_{\text{FDR}}=0.94$ ,  $\eta^2=0.002$ ).



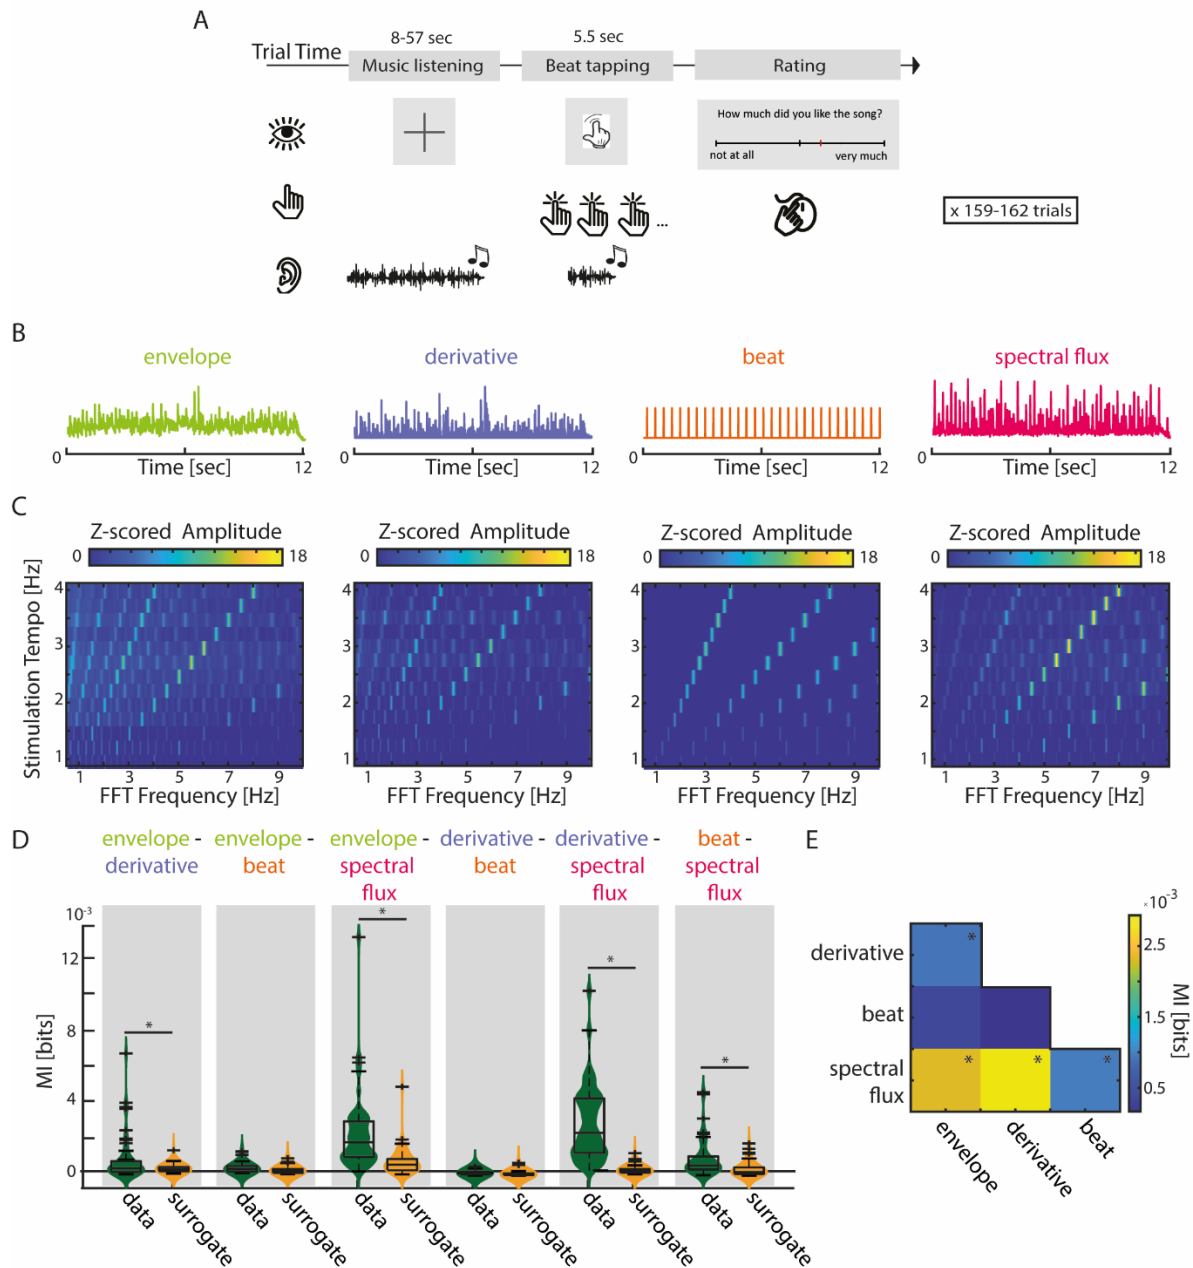

**Figure 1. Experimental design and musical features.** (A) Schematic of the experimental procedure. Each trial consisted of the presentation of one music segment, during which participants were instructed to listen attentively without moving. After a 1-s silence, the last 5.5 s of the music segment was repeated while participants tapped their finger along with the beat. At the end of each trial, participants rated their enjoyment and familiarity of the music segment, as well as the ease with which they were able to tap to the beat (Translated English example in Figure: “How much did you like the song?” rated from “not at all” to “very much”). (B) Exemplary traces of the four musical features of one music segment. (C) Z-scored mean amplitude spectrum of all 4 musical features. (D) Mutual information (MI) for all possible feature combinations (green) compared to a surrogate distribution (yellow, three-way ANOVA,  $*p_{FDR} < 0.001$ , rest:  $p_{FDR} < 0.05$ ). Boxplots indicate the median, the 25<sup>th</sup> and 75<sup>th</sup> percentiles. (E) MI scores between all possible feature combinations ( $*p_{FDR} < 0.001$ , rest:  $p_{FDR} < 0.05$ ).

191 *Neural entrainment was strongest in response to slow music*

192 Neural entrainment to music was investigated using two converging analysis pipelines based  
193 on (1) RCA followed by time- (stimulus-response correlation, SRCorr) and frequency-  
194 (stimulus-response coherence, SRCoh) domain analysis and (2) TRFs.

195 First, an RCA-based analysis approach was used to assess tempo effects on neural  
196 entrainment to music (Fig. 2, Supplementary Fig. 2). RCA involves estimating a spatial filter  
197 that maximizes correlation across data sets from multiple participants (for more details see  
198 *Materials and Methods*) (Kaneshiro et al., 2020, Parra et al., 2018). The resulting time course  
199 data from a single reliable component can then be assessed in terms of its correlation in the  
200 time domain (SRCorr) or coherence in the frequency domain (SRCoh) with different musical  
201 feature time courses. Our analyses focused on the first reliable component, which exhibited an  
202 auditory topography (Fig. 2A). SRCorrs were significantly tempo-dependent for all four  
203 musical features (repeated-measure ANOVAs with Greenhouse-Geiser correction where  
204 required:  $F_{\text{env}}(12,408)=4.5$ ,  $p=8.18e-7$ ,  $\eta^2=0.12$ ;  $F_{\text{der}}(12,408)=2.5$ ,  $p=0.004$ ,  $\eta^2=0.07$ ;  
205  $F_{\text{beat}}(12,408)=2.5$ ,  $p=0.004$ ,  $\eta^2=0.07$ ;  $F_{\text{spec}}(12,408)=5.84$ ,  $p_{\text{GG}}=8.82e-6$ ,  $\eta^2=0.15$ ). Highest  
206 correlations were found at slower tempi (~1-2 Hz). No significant differences were observed  
207 across subgroups ( $F_{\text{env}}(3,32)=1.11$ ,  $p_{\text{FDR}}=0.46$ ,  $\eta^2=0.1$ ;  $F_{\text{der}}(3,32)=0.88$ ,  $p_{\text{FDR}}=0.46$ ,  $\eta^2=0.08$ ;  
208  $F_{\text{beat}}(3,32)=1.5$ ,  $p_{\text{FDR}}=0.46$ ,  $\eta^2=0.12$ ;  $F_{\text{spec}}(3,32)=2.05$ ,  $p_{\text{FDR}}=0.26$ ,  $\eta^2=0.16$ ). In the frequency  
209 domain, normalized SRCoh (Fig. 2E-H) showed clear peaks at the stimulation tempo and  
210 harmonics. Overall, SRCoh was stronger at the first harmonic of the stimulation tempo than at  
211 the stimulation tempo itself, regardless of the musical feature (Fig. 2E-I). This effect was  
212 significant for the envelope, derivative and spectral flux (Fig. 2I, paired-sample t-test,  
213 envelope:  $t(12)=-4.21$ ,  $p_{\text{FDR}}=0.005$ ,  $r_e=0.65$ ; derivative:  $t(12)=-3.09$ ,  $p_{\text{FDR}}=0.03$ ,  $r_e=0.53$ ;  
214 beat:  $t(12)=-2.43$ ,  $p_{\text{FDR}}=0.07$ ,  $r_e=0.44$ ; spectral flux:  $t(12)=-8.26$ ,  $p_{\text{FDR}}=2.25e-5$ ,  $r_e=0.86$ ).  
215 The stimuli themselves mostly also contained highest FFT amplitudes at the first harmonic  
216 (Fig. 2J, envelope:  $t(12)=-6.81$ ,  $p_{\text{FDR}}=5.23e-5$ ,  $r_e=0.81$ ; derivative:  $t(12)=-6.88$ ,  $p_{\text{FDR}}=5.23e-$

217 5,  $r_c=0.81$ ; spectral flux:  $t(12)=-8.04$ ,  $p_{FDR}=2.98e-5$ ,  $r_c=0.85$ ), apart from the beat onsets  
218 (beat:  $t(12)=6.27$ ,  $p_{FDR}=8.56e-5$ ,  $r_c=0.79$ ). For evaluating tempo-dependent effects, we  
219 averaged SRCoh across the stimulation tempo and first harmonic and submitted the average  
220 SRCoh values to repeated-measure ANOVAs for each musical feature. Highest SRCoh was  
221 found for slow music ( $F_{env}(12,408)=2.58$ ,  $p_{GG}=0.02$ ,  $\eta^2=0.07$ ;  $F_{der}(12,408)=2.76$ ,  $p_{GG}=0.01$ ,  
222  $\eta^2=0.08$ ;  $F_{beat}(12,408)=1.29$ ,  $p_{GG}=0.25$ ,  $\eta^2=0.04$ ;  $F_{spec}(12,408)=3.86$ ,  $p_{GG}=0.002$ ,  $\eta^2=0.1$ ). No  
223 significant differences for the SRCoh were observed across subgroups ( $F_{env}(3,32)=1.45$ ,  
224  $p_{FDR}=0.38$ ,  $\eta^2=0.11$ ;  $F_{der}(3,32)=1.39$ ,  $p_{FDR}=0.38$ ,  $\eta^2=0.1$ ;  $F_{beat}(3,32)=1.2$ ,  $p_{FDR}=0.38$ ,  $\eta^2=0.09$ ;  
225  $F_{spec}(3,32)=1.07$ ,  $p_{FDR}=0.38$ ,  $\eta^2=0.08$ ). Individual data examples of the SRCorr and SRCoh  
226 can be found in Supplementary Figure 3.

227         Second, TRFs were calculated for each stimulation tempo. A TRF-based approach is a  
228 linear-system identification technique that serves as a filter describing the mapping of  
229 stimulus features onto the neural response (forward model) (Crosse et al., 2016). Using linear  
230 convolution and ridge regression to avoid overfitting, the TRF was computed based on  
231 mapping each musical feature to “training” EEG data. Using a leave-one-trial-out approach,  
232 the EEG response for the left-out trial was predicted based on the TRF and the stimulus  
233 feature of the same trial. The predicted EEG data were then correlated with the actual, unseen  
234 EEG data (we refer to this correlation value throughout as *TRF correlation*). We analyzed the  
235 two outputs of the TRF analysis: the filter at different time lags, which typically resembles  
236 evoked potentials, and the TRF correlations (Fig. 3, Supplementary Fig. 4). Again, strongest  
237 neural entrainment (here quantified as Pearson correlation coefficient between the predicted  
238 and actual EEG data) was observed for slower music (Fig. 3A). Repeated-measure ANOVAs  
239 showed that, significant effects of Tempo were observed for all musical features, with TRF  
240 correlations being strongest at slower tempi ( $\sim 1$ -2 Hz) ( $F_{env}(12,408)=2.35$ ,  $p_{GG}=0.02$ ,  $\eta^2=0.06$ ;  
241  $F_{der}(12,408)=1.82$ ,  $p=0.04$ ,  $\eta^2=0.05$ ;  $F_{beat}(12,408)=2.29$ ,  $p_{GG}=0.03$ ,  $\eta^2=0.06$ ;  
242  $F_{spec}(12,408)=8.54$ ,  $p_{GG}=2.36e-9$ ,  $\eta^2=0.22$ ).

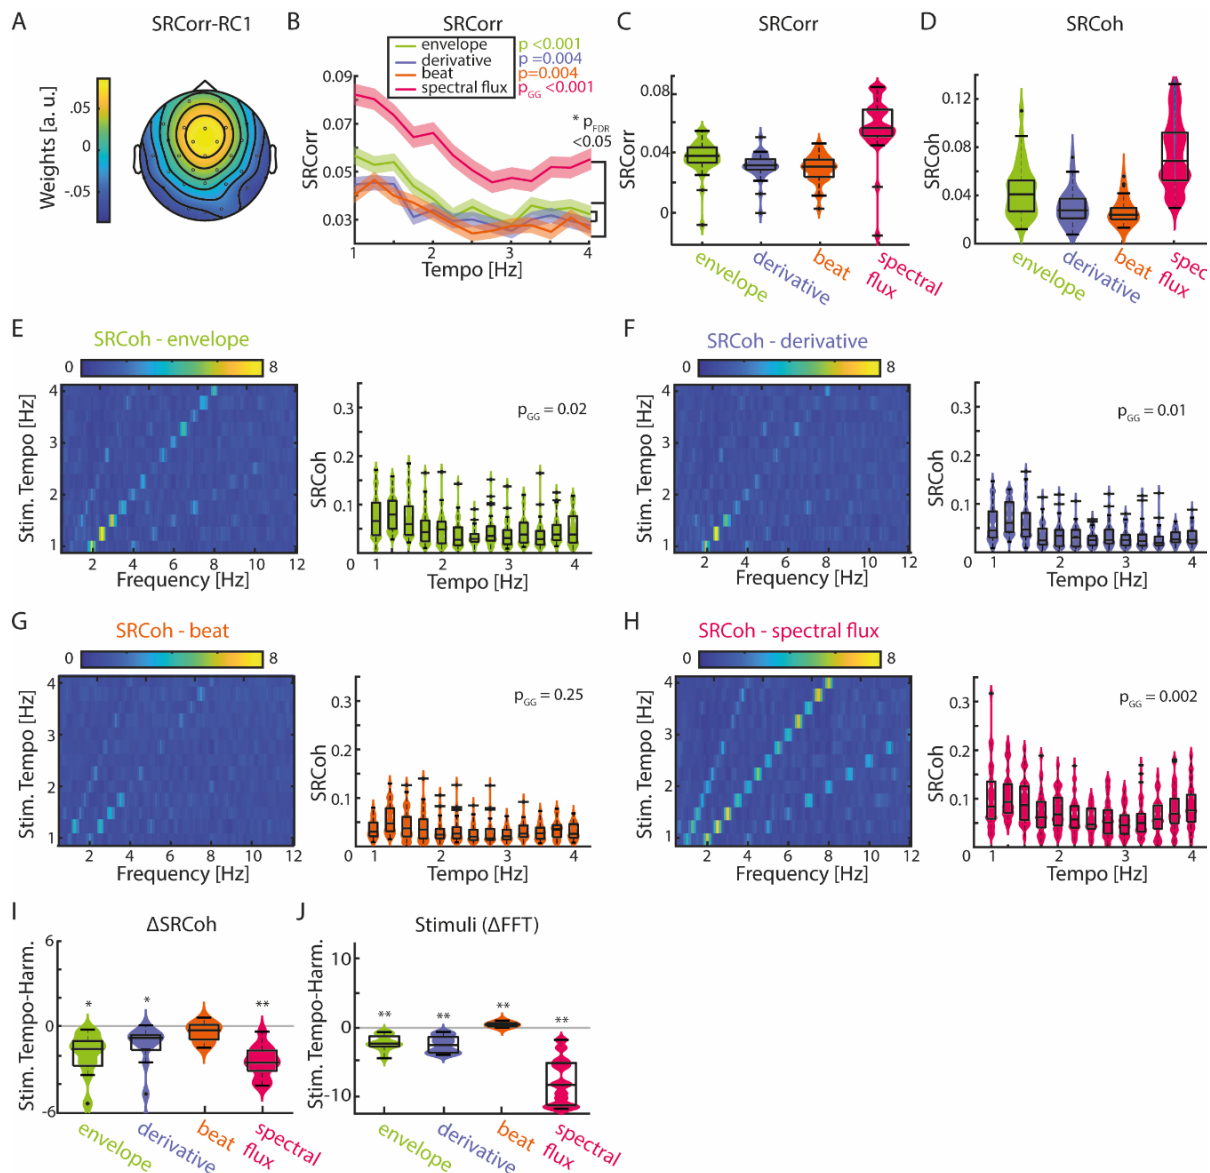

**Figure 2. Stimulus–response correlation and stimulus–response coherence are tempo dependent for all musical features.** (A) Projected topography of the first reliable component (RC1). (B) Average SRCorr across tempi for each musical feature ( $\pm$ SEM; shaded area). Highest correlations were found at slow tempi. Significant differences between tempi were assessed using a repeated-measure ANOVA (with Greenhouse-Geiser correction where applicable) and the slopes of regression models were used to compare the tempo-specificity between musical features. (C) Mean SRCorr across musical features. Highest correlations were found in response to spectral flux. There were significant differences between all possible feature combinations except between the derivative and beat onset features (derivative-beat:  $p_{FDR} = 0.37$ ; repeated-measure ANOVA, Tukey’s test,  $p_{FDR} < 0.001$ ). Boxplots illustrate the median, 25<sup>th</sup> and 75<sup>th</sup> percentiles. (D) Same as (C) for the frequency based SRCoh. All possible feature combinations were significantly different from each other apart from the derivative and beat onsets (derivative-beat:  $p_{FDR} = 0.08$ ;  $p_{FDR} < 0.001$ ). Coherence values were averaged over the stimulus tempo and first harmonic. Normalized SRCoh in response to the (E) amplitude envelope, (F) first derivative, (G) beat onsets and (H) spectral flux. Each panel depicts the stimulus response coherence as colorplot (left) and the pooled SRCoh values at the stimulation tempo and first harmonic (right). (I) Mean differences of SRCoh values at the stimulation tempo and the first

harmonic (negative values: higher SRCoh at harmonic, positive values: higher SRCoh at stimulation tempo, paired-sample t-test, \* $p_{FDR}<0.05$ ; \*\* $p_{FDR}<0.001$ ). (J) Same as (I) based on the FFT amplitudes of each musical feature.

243

#### 244 *Spectral flux drives strongest neural entrainment*

245 As natural music is a complex, multi-layered auditory stimulus, we sought to explore the  
246 neural response to different musical features and to identify the stimulus feature or features  
247 that would evoke strongest neural entrainment. Regardless of the dependent measure (RCA-  
248 SRCorr, RCA-SRCoh, TRF correlation), strongest neural entrainment was found in response  
249 to the spectral flux (Fig. 2C-D, 3B). In particular, significant differences (as quantified with a  
250 repeated-measure ANOVA followed by Tukey's test) were observed between the spectral flux  
251 and all other musical features using the SRCorr ( $F_{SRCorr}(3,140)=33.41$ ,  $p_{GG}=4.01e-15$ ,  
252  $\eta^2=0.5$ ), SRCoh ( $F_{SRCoh}(3,140)=38.83$ ,  $p_{GG}=5.53e-10$ ,  $\eta^2=0.53$ ) and TRF correlations  
253 ( $F_{TRF}(4,175)=24.56$ ,  $p_{GG}=2.2e-10$ ,  $\eta^2=0.42$ ).

254 As the TRF approach offers the possibility of running a multivariate analysis, all  
255 musical features were combined and compared to the single-feature TRF correlations (Fig.  
256 3B). Although there was a significant increase in TRF correlations in comparison to the  
257 amplitude envelope (repeated-measure ANOVA with follow-up Tukey's test,  $p_{FDR}=1.66e-8$ ),  
258 first derivative ( $p_{FDR}=1.66e-8$ ) and beat onsets ( $p_{FDR}=1.66e-8$ ), the spectral flux alone showed  
259 an advantage over the multi-featured TRF ( $p_{FDR}=2.18e-4$ ). Thus, taking all stimulus features  
260 together is not a better descriptor of the neural response than the spectral flux alone,  
261 indicating together with the MI results from Figure 1 that spectral flux is a more complete  
262 representation of the rhythmic structure of the music than the other musical features.

263 To test how strongly modulated TRF correlations were by each musical feature, a  
264 regression line was fitted to single-participant TRF correlations as a function of tempo, and  
265 the slopes were compared across musical features (Fig. 3A). Linear slopes were significantly  
266 higher for the spectral flux and the multivariate model compared to the remaining three

267 musical features with the exception of the slopes of the multivariate model and envelope (one-  
268 way ANOVA, envelope-spectral flux:  $p_{FDR} = 0.005$ ; envelope – all:  $p_{FDR} = 0.06$ ; derivative-  
269 spectral flux:  $p_{FDR} = 3e-4$ ; derivative – all:  $p_{FDR} = 0.005$ ; beat-spectral flux:  $p_{FDR} = 3e-4$ ; beat –  
270 all:  $p_{FDR} = 0.006$ ). The results for SRCorr were qualitatively similar (envelope-spectral flux:  
271  $p_{FDR} = 0.046$ ; derivative-spectral flux:  $p_{FDR} = 3e-4$ ; beat-spectral flux:  $p_{FDR} = 0.002$ ; Fig. 2B).

272 We also examined the time courses of TRF weights (Fig. 3C–F) for time lags between  
273 0 and 400 ms. Cluster-based permutation testing (1000 repetitions) was used to identify time  
274 windows in which TRF weights differed across tempi for each musical feature (see *Materials*  
275 *and Methods* for more details). Significant effects of tempo on TRF weights were observed  
276 for the beat times at time lags between 164–351 ms ( $p=0.036$ ) and for the spectral flux  
277 between 101–242 ms ( $p<0.001$ ) and 312–398 ms ( $p=0.033$ ) (Fig. 3E–I). For these two musical  
278 features, the tempo specificity was observable in the amplitudes of the TRF weights, which  
279 were largest for slower music (Fig. 3G–I). The TRFs for the amplitude envelope and first  
280 derivative demonstrated similar patterns to each other, with strong deflections in time  
281 windows consistent with a canonical auditory P1–N1–P2 complex, but did not differ  
282 significantly between stimulation tempi (Fig. 3C–D). In contrast, the full-band (Hilbert)  
283 amplitude envelope and the corresponding first derivative (Supplementary Fig. 4) displayed  
284 tempo-specific effects at time lags of 172–305 ms (envelope,  $p=0.01$ ) and 219–344 ms  
285 (derivative,  $p=0.01$ ). Visual inspection suggested that TRF differences for these musical  
286 features were related to latency, as opposed to amplitude (Supplementary Fig. 4E–F, I–J).  
287 Therefore, we identified the latencies of the TRF-weight time courses within the time window  
288 of the N2, and fit a piece-wise linear regression to those mean latency values per musical  
289 feature (Supplementary Fig. 4G, K). In particular, TRF latency in the N2 time window  
290 decreased over the stimulation tempo conditions from 1–2.5 Hz and from 2.75–4 Hz for both  
291 stimulus features (envelope:  $T_{1-2.5\text{Hz}}=-0.86$ ,  $p=0.43$ ;  $T_{2.75-4\text{Hz}}=-2.04$ ,  $p=0.11$ ), but this was only  
292 significant for the derivative ( $T_{1-2.5\text{Hz}}=-4.44$ ,  $p=0.007$ ;  $T_{2.75-4\text{Hz}}=-4.05$ ,  $p=0.016$ ).

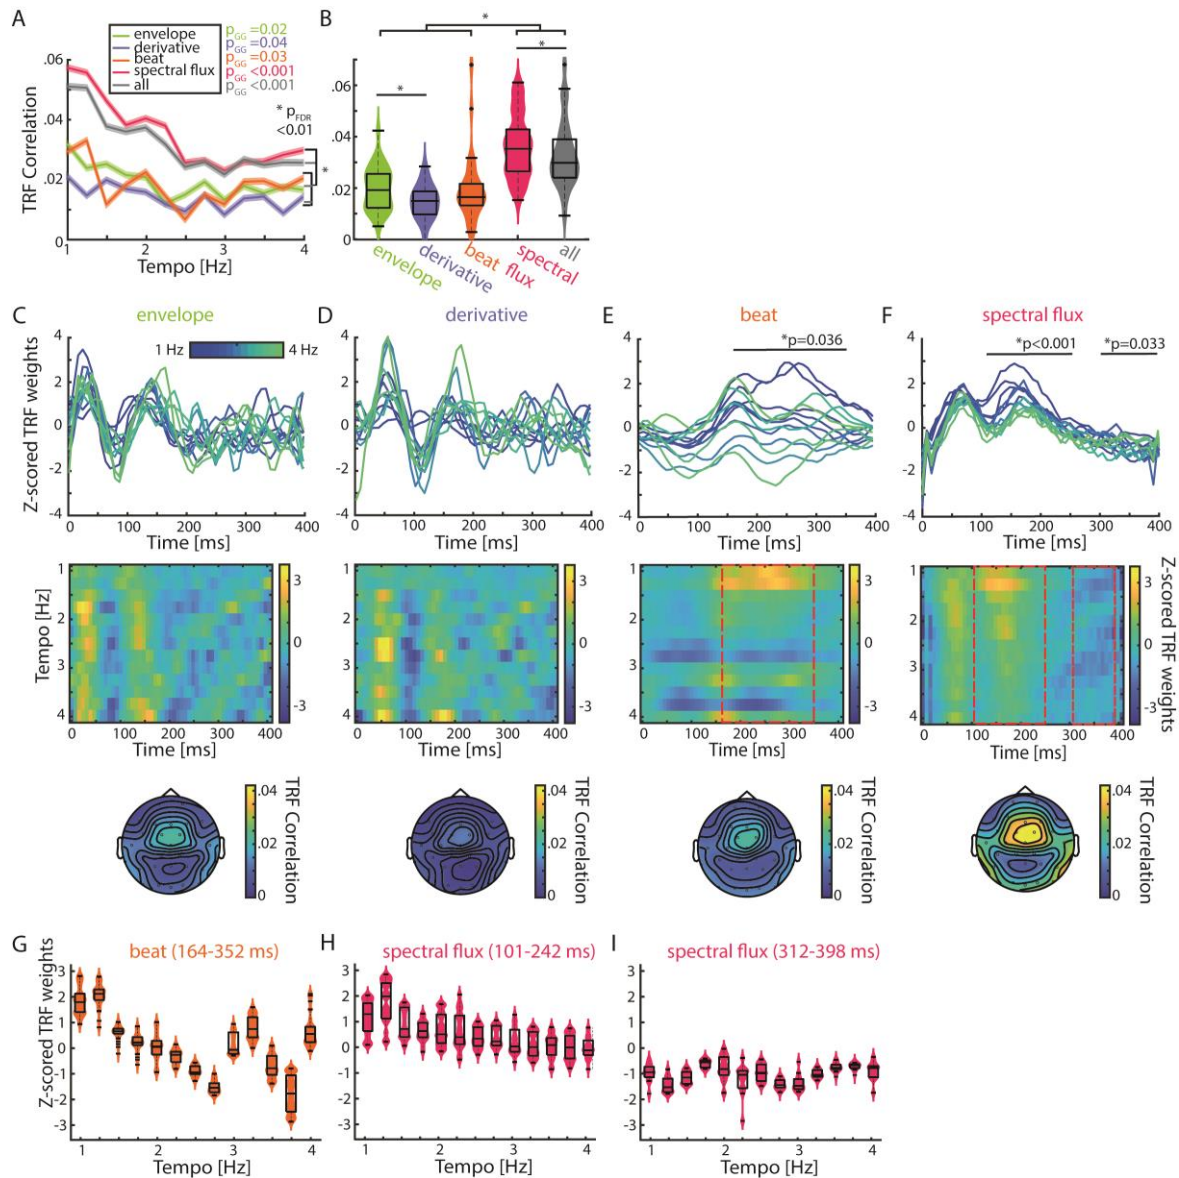

**Figure 3. TRFs are tempo dependent.** (A) Mean TRF ( $\pm$ SEM) correlations as a function of stimulation tempo per stimulus feature (p-values next to the legend correspond to a repeated-measure ANOVA across tempi for every musical feature and p-value below the legend to a one-way ANOVA based on the slopes of a linear regression model). TRF correlations were highest for spectral flux and combined musical features for slow tempi. (B) Violin plots of the TRF correlations across musical features. Boxplots illustrate the median, 25<sup>th</sup> and 75<sup>th</sup> percentiles (n=36). Significant pairwise musical feature comparisons were calculated using a repeated-measure ANOVA with follow-up Tukey’s test,  $*p_{FDR}<0.001$ . (C) Top panel: TRF time lags (0-400 ms) of the amplitude envelope. Each line depicts one stimulation tempo (13 tempi between 1 Hz, blue and 4 Hz, green). Middle panel: Colormap of the normalized TRF weights of the envelope in the same time window across stimulation tempi. Lower panel: Topographies of the TRF correlations in response to the amplitude envelope. (D) Same as (C) for the first derivative, (E) beat onsets and (F) spectral flux. Cluster-based permutation testing was used to identify significant tempo-specific time windows (red dashed box,  $p<0.05$ ). Mean TRF weights in response to (G) beat onsets from the significant time lag window (164-351 ms), (H) spectral flux for time lags between 101-242 ms and (I) between 312-398 ms.

294 *Results of TRF and SRCorr/SRCoh converge*

295 So far, we demonstrated that both RCA- and TRF-based measures of neural entrainment lead  
296 to similar results at the group level, and reveal strongest neural entrainment to spectral flux  
297 and at slow tempi. Next, we wanted to quantify the relationship between the SRCorr/SRCoh  
298 and TRF correlations across individuals (Fig. 4, Supplementary Fig. 3). This could have  
299 implications for the interpretation of studies focusing only on one method. To test this  
300 relationship, we predicted TRF correlations from SRCorr or SRCoh values (fixed effect) in  
301 separate linear mixed-effects models with Participant and Tempo as random effects (grouping  
302 variables). Each musical feature was modeled independently. For all four musical features,  
303 SRCorr significantly predicted TRF correlations ( $t_{\text{env}}(466) = 6.46$ ,  $\beta_{\text{env}} = 0.38$ ,  $p_{\text{FDR}} = 5.37e-10$ ,  
304  $R^2 = 0.41$ ;  $t_{\text{der}}(466) = 3.63$ ,  $\beta_{\text{der}} = 0.22$ ,  $p_{\text{FDR}} = 4e-4$ ,  $R^2 = 0.16$ ;  $t_{\text{beat}}(466) = 2.64$ ,  $\beta_{\text{beat}} = 0.26$ ,  $p_{\text{FDR}} =$   
305  $0.009$ ,  $R^2 = 0.41$ ;  $t_{\text{spec}}(466) = 11.62$ ,  $\beta_{\text{spec}} = 0.52$ ,  $p_{\text{FDR}} = 5.78e-27$ ,  $R^2 = 0.73$ ). The strongest  
306 correlations between neural entrainment measures were found for the spectral flux of music  
307 (Fig. 4D). In the frequency domain, we examined the SRCoh values at the stimulation tempo  
308 and first harmonic separately (Supplementary Fig. 5). SRCoh values at both the intended  
309 stimulation tempo and the first harmonic significantly predicted TRF correlations for all  
310 musical features. For all musical features, the intended stimulation tempo was a better  
311 predictor of TRF correlations than the first harmonic except for the spectral flux and  
312 derivative (intended tempo:  $t_{\text{env}}(466) = 4.47$ ,  $\beta_{\text{env}} = 0.15$ ,  $p_{\text{FDR}} = 2.62e-05$ ,  $R^2 = 0.32$ ;  $t_{\text{der}}(466)$   
313  $= 2.03$ ,  $\beta_{\text{der}} = 0.07$ ,  $p_{\text{FDR}} = 0.04$ ,  $R^2 = 0.11$ ;  $t_{\text{beat}}(466) = 2.37$ ,  $\beta_{\text{beat}} = 0.12$ ,  $p_{\text{FDR}} = 0.02$ ,  $R^2 = 0.37$ ;  
314  $t_{\text{spec}}(466) = 3.65$ ,  $\beta_{\text{spec}} = 0.1$ ,  $p_{\text{FDR}} = 4e-4$ ,  $R^2 = 0.62$ ; first harmonic:  $t_{\text{env}}(466) = 5.89$ ,  $\beta_{\text{env}} = 0.08$ ,  
315  $p_{\text{FDR}} = 2.96e-8$ ,  $R^2 = 0.26$ ;  $t_{\text{der}}(466) = 3.86$ ,  $\beta_{\text{der}} = 0.06$ ,  $p_{\text{FDR}} = 2e-4$ ,  $R^2 = 0.1$ ;  $t_{\text{beat}}(466) = 3.12$ ,  
316  $\beta_{\text{beat}} = 0.1$ ,  $p_{\text{FDR}} = 0.003$ ,  $R^2 = 0.35$ ;  $t_{\text{spec}}(466) = 6.39$ ,  $\beta_{\text{spec}} = 0.09$ ,  $p_{\text{FDR}} = 3.16e-9$ ,  $R^2 = 0.62$ ).

317 Overall, these results suggest that, despite their differences, TRF and RCA–SRCorr/RCA–  
318 SRCoh pick up on similar features of the neural response, but may potentially strengthen each  
319 other’s explanatory power when used together.



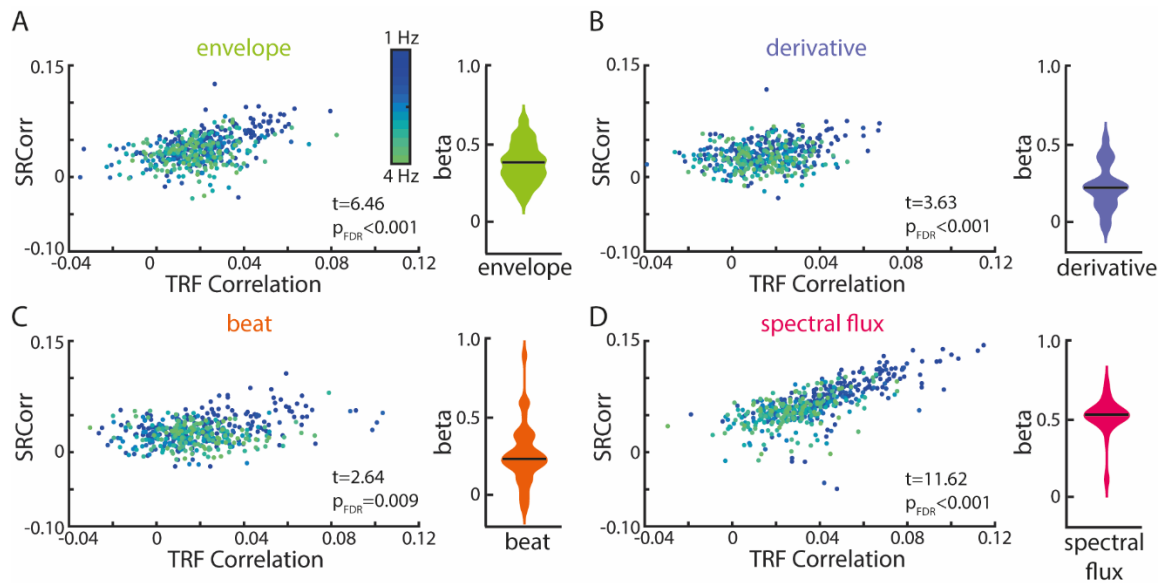

**Figure 4. Significant relationships between SRCorr and TRF correlations for all musical features.** (A) Linear-mixed effects models of the SRCorr (predictor variable) and TRF correlations (response variable) in response to the amplitude envelope. Each dot represents the mean correlation of one participant ( $n=36$ ) at one stimulation tempo ( $n=13$ ) (=grouping variables; blue, 1 Hz-green, 4 Hz). Violin plots illustrate fixed effects coefficients ( $\beta$ ). (B)-(D) same as (A) for the first derivative, beat onsets and spectral flux. For all musical features, the fixed effects were significant.

320

321 *Familiar songs and songs with an easy-to-tap beat drive strongest neural entrainment*

322 Next, we tested whether neural entrainment to music depended on 1) how much the song was  
323 enjoyed, 2) the familiarity of the song, and 3) how easy it was to tap the beat of the song; each  
324 of these characteristics was rated on a scale ranging between  $-100$  and  $+100$ . We  
325 hypothesized that difficulty to perceive and tap to the beat in particular would be associated  
326 with weaker neural entrainment. Ratings on all three dimensions are shown in Figure 5A. To  
327 evaluate the effects of tempo on the individual's ratings, separate repeated-measure ANOVAs  
328 were conducted for each behavioral rating. Although enjoyment ( $F(12,408)=1.2$ ,  $p_{GG}=0.31$ ,  
329  $\eta^2=0.03$ ) and familiarity ( $F(12,408)=1.93$ ,  $p_{GG}=0.09$ ,  $\eta^2=0.05$ ) were unaffected by tempo,  
330 participants indicated that it was more difficult to tap to the beat of faster than slower stimuli  
331 ( $F(12,408)=6.3$ ,  $p_{GG}=4.71e-06$ ,  $\eta^2=0.17$ ).

332 To assess the effects of familiarity, enjoyment, and beat-tapping ease on neural  
333 entrainment, TRFs in response to spectral flux were calculated for the 15 trials with the

334 highest and the 15 trials with the lowest ratings per participant per behavioral rating condition  
335 (Fig. 5B-F). TRF correlations were not significantly different for less enjoyed compared to  
336 more enjoyed music (paired-sample t-test,  $t(35)=1.22$ ,  $p_{FDR}=0.23$ ,  $r_e=0.24$ ; Fig. 5C). In  
337 contrast, significantly higher TRF correlations were observed for familiar vs. unfamiliar songs  
338 ( $t(35)=-2.88$ ,  $p_{FDR}=0.02$ ,  $r_e=0.51$ ), and there was a trend for stronger neural entrainment to  
339 songs with an easier-to-perceive beat ( $t(35)=-1.94$ ,  $p_{FDR}=0.09$ ,  $r_e=0.37$ ). These results were  
340 reflected in the TRFs at time lags between 0-400 ms (Fig. 5D-F).

341         Next, we wanted to entertain the possibility that musical training could modulate  
342 neural entrainment to music. Therefore, participants with less than 2 years of regular, daily  
343 music training were assigned to a “non-musician” group ( $n=17$ ) and participants with over 6  
344 years of regular music training were labelled as “musicians” ( $n=14$ ). Although there is little  
345 agreement about the specific criterion that should be used to defined musician and non-  
346 musician participants, this division had the advantages that it ignored participants with  
347 medium amounts of training and it roughly equally divided our sample. Subsequently, TRF  
348 correlations were compared between groups (Supplementary Fig. 6). Regardless of the  
349 stimulus feature, no significant differences were detected between participants with different  
350 levels of musical expertise (paired-sample t-test, envelope:  $p_{FDR}=0.93$ ; derivative:  $p_{FDR}=0.93$ ;  
351 beats:  $p_{FDR}=0.85$ ; spectral flux:  $p_{FDR}=0.93$ ). Moreover, the Goldsmith’s Musical  
352 Sophistication Index (Gold-MSI) was used to quantify musical “sophistication” (referring not  
353 only to the years of musical training, but also e. g. musical engagement or self-reported  
354 perceptual abilities (Müllensiefen et al., 2014)), which we then correlated with neural  
355 entrainment. No significant correlations were observed between musical sophistication and  
356 TRF correlations (Pearson correlation, envelope:  $R=-0.22$ ,  $p_{FDR}=0.26$ ; derivative:  $R=-0.16$ ,  
357  $p_{FDR}=0.26$ ; beats:  $R=-0.25$ ,  $p_{FDR}=0.34$ ; spectral flux:  $R=-0.29$ ,  $p_{FDR}=0.26$ ; Supplementary Fig.  
358 6).

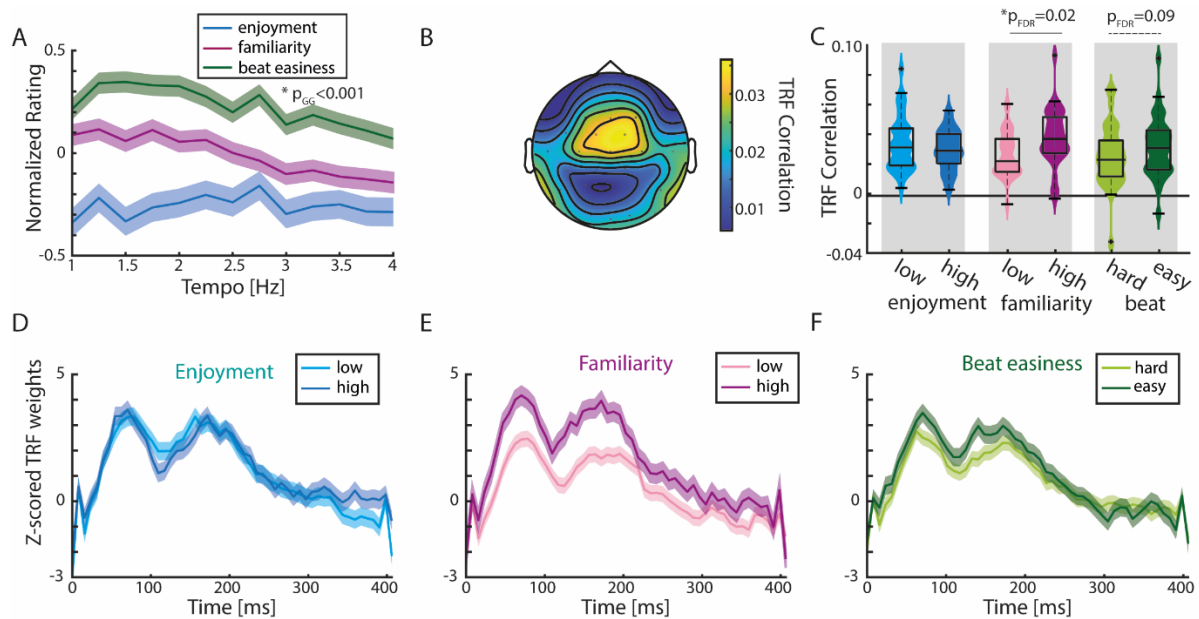

**Figure 5. TRF correlations are highest in response to familiar songs.** (A) Normalized (to the maximum value per rating/participant), averaged behavioral ratings of enjoyment, familiarity and easiness to tap to the beat ( $\pm$ SEM). Significant differences across tempo conditions were observed (repeated-measure ANOVA with Greenhouse-Geiser correction). (B) Mean TRF correlations topography across all ratings (based on the analysis of 15 trials with highest and lowest ratings per behavioral measure). (C) Violin plots of TRF correlations comparing low vs. highly enjoyed, low vs. highly familiar, and subjectively difficult vs. easy beat trials. Strongest TRF correlations were found in response to familiar music (paired-sample t-test,  $p_{FDR}=0.02$ ). (D) Mean TRFs ( $\pm$ SEM) for time lags between 0-400 ms of more and less enjoyable music songs. (E)-(F) Same as (D) for trials with low vs. high familiarity and difficult vs. easy beat ratings.

359

360 *Brain responses to musical features predicts perceived beat rate*

361 In natural music, the beat can be perceived at multiple metrical levels. For that reason, it was

362 possible that listeners did not perceive the beat at the tempo we intended (the stimulation

363 tempo), but may have instead perceived the beat at double or half that rate. Thus, we wanted

364 to explore whether our TRF-based measures of neural entrainment simply reflected the

365 stimulus tempo that we presented, or whether they might be sensitive to perceived beat rate

366 when that differed from the stimulation tempo, i.e., the intended beat rate. For this analysis,

367 we made use of the tapping data that were collected in the final part of each trial, during

368 which participants finger-tapped to the beat for 5.5 s. Trials with at least three consistent taps

369 were assigned to a perceived tempo condition (1-4 Hz in steps of 0.25-Hz, see *Materials and*

370 *Methods* for more details). In this study, we will use the term “stimulation tempo” to refer to

371 the predominant beat frequency in each music segment, whereas we will use the term “tapped  
372 beat rate” when referring to the tapped frequency. The preferred tapped beat rate on the group  
373 level was ~1.55 Hz (Supplementary Fig. 7C, mode of skewed Gaussian fitted to mean  
374 histograms of the relative number of trials per tapped beat rate).

375 We wanted to test if we could identify the stimulation tempo (chosen by us) or the  
376 tapped beat rate (rate the participant tapped to) based on the neural data, in particular when  
377 the stimulation tempo and the tapped beat rate were different. We used a support vector  
378 machine (SVM) classifier to first, predict the stimulation tempo (Fig. 6A-B) and second, to  
379 predict the perceived (tapped) rate based on the neural response to different musical features  
380 (Fig. 6C-D). For predicting the stimulation tempo, we identified two sets of 6 trials (per  
381 participant) each, one set where the participants tapped the intended stimulation tempo and  
382 the other set where they tapped the same rate, but the intended stimulation tempo was twice as  
383 fast as what the participants tapped, i.e., participants tapped the subharmonic of the  
384 stimulation tempo. We were able to do this for 19 of our 36 participants. Next, TRFs were  
385 computed in response to each musical feature for each set of trials (tapped rate = intended  
386 stimulation tempo vs. same tapped rate = 2\*stimulation tempo). The SVMs were computed  
387 using bootstrapping (100 repetitions) and a leave-one-out approach. The mean SVM  
388 prediction accuracies for each musical feature were compared to a surrogate distribution  
389 generated by randomly shuffling the tempo labels (tapped rate = intended stimulation tempo  
390 vs. same tapped rate = 2\*stimulation tempo) when training the SVM classifier. We observed  
391 significantly higher prediction accuracies in comparison to the surrogate data for all musical  
392 features (paired-sample t-test, envelope:  $t(18)=51.89$ ,  $p_{\text{FDR}} < 1e-15$ ,  $r_e=0.996$ ; derivative:  
393  $t(18)=124.4$ ,  $p_{\text{FDR}} < 1e-15$ ,  $r_e=0.999$ ; beat onsets:  $t(18)=78.91$ ,  $p_{\text{FDR}} < 1e-15$ ,  $r_e=0.998$ ; spectral  
394 flux:  $t(18)=99.92$ ,  $p_{\text{FDR}} < 1e-15$ ,  $r_e=0.998$ ; Fig. 6A). This shows that even if the perceived  
395 tempo of two musical pieces is the same, the intended (acoustic) stimulation tempo evokes  
396 varying levels of neural entrainment. For comparing the prediction accuracies across musical

397 features, an accuracy index  $((\text{Accuracy}_{\text{Data}} - \text{Accuracy}_{\text{Surr}}) / (\text{Accuracy}_{\text{Data}} + \text{Accuracy}_{\text{Surr}}))$  was  
398 submitted to a repeated-measure ANOVA. No significant differences between musical  
399 features were observed ( $F(3,72)=0.83$ ,  $p=0.49$ ,  $\eta^2=0.05$ ; Fig.6B).

400 Next, the neural response to different musical features were used to predict the tapped  
401 beat rate for sets of trials with the same stimulation tempo (intended stimulation tempo =  
402 tapped rate vs. same stimulation tempo =  $2 \times$  tapped rate). Analogous to the previously  
403 described analysis pipeline, 13 individual datasets from different tempo conditions (this time  
404 from only 9 participants with each one dataset and two participants with each two datasets to  
405 increase the sample size) were identified that met the criterion. All SVM classifier prediction  
406 accuracies yielded significant differences in comparison to the surrogate data (paired-samples  
407 t-test, envelope:  $t(12)=52.02$ ,  $p_{\text{FDR}}=2.22e-15$ ,  $r_e=0.996$ ; derivative:  $t(12)=122.61$ ,  $p_{\text{FDR}} < 1e-$   
408  $15$ ,  $r_e=0.999$ ; beat onsets:  $t(12)=44.57$ ,  $p_{\text{FDR}}=1.07e-14$ ,  $r_e=0.994$ ; spectral flux:  $t(12)=54.31$ ,  
409  $p_{\text{FDR}}=2e-15$ ,  $r_e=0.996$ ; Fig. 6C), suggesting that entrained neural responses also possess  
410 unique signatures of the perceived beat rate, even when it is different from the stimulation  
411 tempo. No significant differences in predicting the tapped beat rate between musical features  
412 were observed ( $F(3,48)=0.17$ ,  $p=0.92$ ,  $\eta^2=0.02$ ; Fig. 6D).

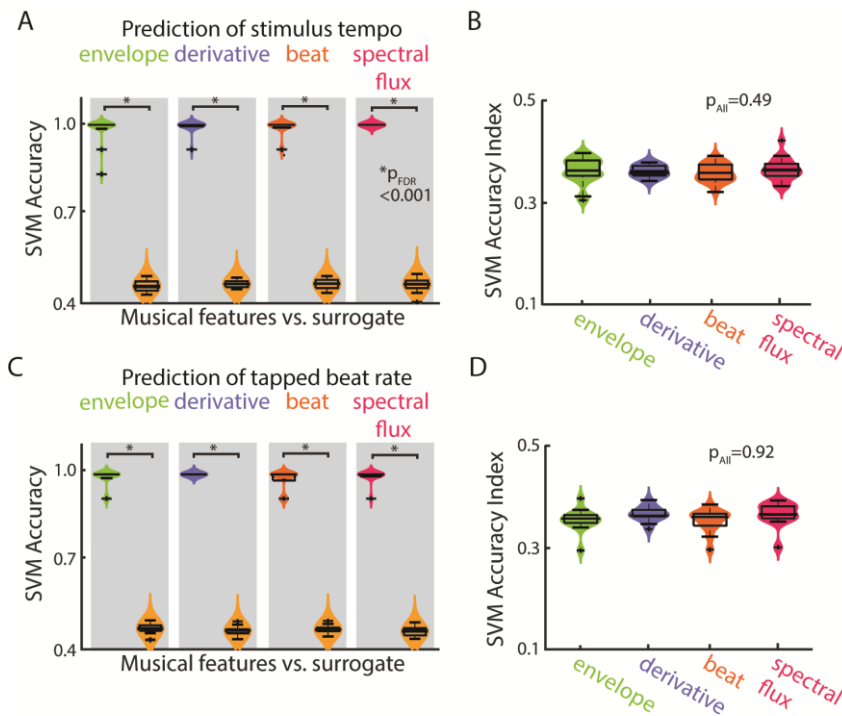

**Fig. 6. Tapped beat rate can be predicted based on the neural response to musical features.** (A) Violin plot of the mean accuracies of a support vector machine (SVM) classifier predicting the stimulation tempo (n=19; tapped rate = intended stimulation tempo vs. same tapped rate = 2\*stimulation tempo). Based on the TRFs to all musical features, significant differences in prediction accuracies were computed in comparison to a surrogate (paired-sample t-test, \*p<sub>FDR</sub><0.001). (B) Comparison of SVM classifier accuracies  $((\text{Accuracy}_{\text{Data}} - \text{Accuracy}_{\text{Surr}}) / (\text{Accuracy}_{\text{Data}} + \text{Accuracy}_{\text{Surr}}))$  across musical features revealed no significant differences in predicting the stimulation tempo (repeated-measure ANOVA, p=0.92). (C)-(D) Same as (A)-(B), but here the SVM classifier predicted the tapped rate based on the TRFs (n=13; intended stimulation tempo = tapped rate vs. same stimulation tempo = 2\*tapped rate) (paired-sample t-test, p<sub>FDR</sub><0.001). No differences were observed in SVM prediction accuracies across musical features (repeated-measure ANOVA, p=0.92).

413

## 414 Discussion

415 We investigated neural entrainment to naturalistic, polyphonic music presented at different

416 tempi. The music stimuli varied along a number of dimensions in idiosyncratic ways,

417 including the familiarity and enjoyment of the music, and the ease with which the beat was

418 perceived. The current study demonstrates that neural entrainment is strongest to 1) music

419 with beat rates between 1 and 2 Hz, 2) spectral flux of music, 3) familiar music and music

420 with an easy-to-perceive beat. In addition, 4) brain responses to the music stimuli were

421 informative regarding the listeners' perceived metrical level of the beat, and 5) analysis  
422 approaches based on TRF and RCA revealed converging results.  
423 *Neural entrainment was strongest to music with beat rates in the 1–2 Hz range*  
424 Strongest neural entrainment was found in response to stimulation tempi between 1 and 2 Hz  
425 in terms of SRCorr (Fig. 2B), TRF correlations (Fig. 3A), and TRF weights (Fig. 3C-F).  
426 Moreover, we observed a behavioral preference to tap to the beat in this frequency range, as  
427 the group preference for music tapping was at 1.55 Hz (Supplementary Fig. 7C). Previous  
428 studies have shown a preference to listen to music with beat rates around 2 Hz (Bauer et al.,  
429 2015), which is moreover the modal beat rate in Western pop music (Moelants, 2002) and the  
430 rate at which the modulation spectrum of natural music peaks (Ding et al., 2017). Even in  
431 nonmusical contexts, spontaneous adult human locomotion is characterized by strong energy  
432 around 2 Hz (MacDougall and Moore, 2005). Moreover, when asked to rhythmically move  
433 their bodies at a comfortable rate, adults will spontaneously move at rates around 2 Hz  
434 (McAuley et al., 2006) regardless whether they use their hands or feet (Rose et al., 2020).  
435 Thus, there is a tight link between preferred rates of human body movement and preferred  
436 rates for the music we make and listen to that was moreover reflected in our neural data. This  
437 is perhaps not surprising, as musical rhythm perception activates motor areas of the brain,  
438 such as the basal ganglia and supplementary motor area (Grahn and Brett, 2007), and is  
439 further associated with increased auditory–motor functional connectivity (Chen et al., 2008).  
440 In turn, involving the motor system in rhythm perception tasks improves temporal acuity  
441 (Morillon et al., 2014), but only for beat rates in the 1–2 Hz range (Zalta et al., 2020).

442 In the frequency domain, SRCoh was strongest at the stimulation tempo and its harmonics  
443 (Fig. 2E-I). In fact, highest coherence was observed at the first harmonic and not at the  
444 stimulation tempo itself (Fig. 2I). This replicates previous work that also showed higher  
445 coherence (Kaneshiro et al., 2020) and spectral amplitude (Tierney and Kraus, 2015) at the  
446 first harmonic than at the musical beat rate. There are several potential reasons for this

447 finding. One reason could be that the stimulation tempo that we defined for each musical  
448 stimulus was based on beat rate, but natural music can be subdivided into smaller units (e.g.,  
449 notes) that can occur at faster time scales. A recent MEG study demonstrated inter-trial phase  
450 coherence for note rates up to 8 Hz (Doelling and Poeppel, 2015). Hence, the neural responses  
451 to the music stimuli in the current experiment likely tracked not only the beat rate, but also  
452 faster elements such as notes. In line with this hypothesis, FFTs conducted on the stimulus  
453 features themselves showed higher amplitudes at the first harmonic than the stimulation  
454 tempo for all musical features except the beat onsets (Fig. 2J). Moreover, there are other  
455 explanations for higher coherence at the first harmonic than at the beat rate. For example, the  
456 low-frequency beat-rate neural responses fall into a steeper part of the  $1/f$  slope, and as such  
457 may simply suffer from worse signal-to-noise ratio than their harmonics.

458       Regardless of the reason, since frequency-domain analyses separate the neural response  
459 into individual frequency-specific peaks, it is easy to interpret neural tracking (SRCoh) or  
460 stimulus spectral amplitude at the beat rate and the note rate – or at the beat rate and its  
461 harmonics – as independent (Keitel et al., 2021). However, music is characterized by a nested,  
462 hierarchical rhythmic structure, and it is unlikely that neural tracking at different metrical  
463 levels goes on independently and in parallel. One potential advantage of TRF-based analyses  
464 is that they operate on relatively wide-band data compared to Fourier-based approaches, and  
465 as such are more likely to preserve nested neural activity and perhaps less likely to lead to  
466 over- or misinterpretation of frequency-specific effects.

467

#### 468 *Neural entrainment is driven by spectral flux*

469 Neural entrainment was strongest in response to the spectral flux of music, regardless whether  
470 the analysis was based on TRFs or RCA. Similar to speech-tracking studies, music-tracking  
471 studies typically use the amplitude envelope of the sound to characterize the stimulus rhythm  
472 (Vanden Bosch der Nederlanden et al., 2020, Kumagai et al., 2018, Doelling and Poeppel,



473 2015, Decruy et al., 2019, Reetzke et al., 2021). Although speech and music share features  
474 such as amplitude fluctuations over time and hierarchical grouping (Patel, 2003), there are  
475 differences in their spectro-temporal composition that make spectral information especially  
476 important for music perception. For example, while successful speech recognition requires 4-  
477 8 spectral channels, successful recognition of musical melodies requires at least 16 spectral  
478 channels (Shannon, 2005) – the flipside of this is that music is more difficult than speech to  
479 understand based only on amplitude-envelope information. Moreover, increasing spectral  
480 complexity of a music stimulus enhances neural entrainment (Wollman et al., 2020).  
481 Critically, both temporal and spectral information influence the perceived accent structure in  
482 music (Pfordresher, 2003).

483         A recent study claimed that neuronal activity synchronizes less strongly to music than  
484 to speech (Zuk et al., 2021); notably they focused specifically on amplitude envelope to  
485 characterize the stimulus rhythms. We argue that the amplitude envelope – even when passed  
486 through a model of the peripheral auditory system – is a suboptimal measure to approximate  
487 individual note onsets that convey rhythmic structure in music and to which neural activity  
488 can be entrained (Miller, 2015). Imagine listening to a melody played in a *glissando* fashion on  
489 a violin. There might never be a clear onset that would be represented by the amplitude  
490 envelope – all of the rhythmic structure is communicated by spectral changes. Thus, in this  
491 study we wanted to compare neural entrainment by the amplitude envelope to neural  
492 entrainment by spectral flux, which compares spectral content, i.e., power spectra, on a frame-  
493 to-frame basis, and which is arguably a more appropriate measure of rhythmic and metrical  
494 structure in music. Indeed, many automated tools for extracting the beat in music used in the  
495 musical information retrieval (MIR) literature rely on spectral flux information (Oliveira et  
496 al., 2010). Also in the context of body movement, spectral flux has been associated with the  
497 type and temporal acuity of synchronization between the body and music at the beat rate  
498 (Burger et al., 2018) to a greater extent than other acoustic characterizations of musical

499 rhythmic structure. As such, we found that spectral flux drove stronger entrainment than the  
500 amplitude envelope.

501         Using TRF analysis, we found that not only was neural entrainment to spectral flux  
502 stronger than to any other musical feature, it was also stronger than to the response to a multi-  
503 variate predictor that combined all musical features. For this reason, we calculated the shared  
504 information (MI) between each pair of musical features, and found that spectral flux shared  
505 significant information with all other musical features (Fig. 1). Hence, spectral flux seems to  
506 capture information also contained in, for example, the amplitude envelope, but contains  
507 unique information about rhythmic structure that cannot be gleaned from the other acoustic  
508 features (Fig. 3). This finding has potentially important implications for direct comparisons of  
509 neural tracking of music and speech, or music and natural sounds (Zuk et al., 2021). We  
510 would caution that conclusions about differences in how neural activity entrains to different  
511 categories of sounds should be sure to characterize stimuli as fairly as possible rather than  
512 relying on the amplitude envelope as a one-size-fits-all summary of rhythmic structure.

513

514 *Neural entrainment was strongest to familiar songs and songs with an easy beat*

515 We found that the strength of neural entrainment depended on the familiarity of music and, to  
516 a lesser extent, the ease with which a beat could be perceived (Fig. 5). This is in line with a  
517 previous study showing stronger neural entrainment to familiar music (Madsen et al., 2019). It  
518 is likely that songs a person knows – familiar songs – increase engagement. We note that we  
519 did not have a measure of engagement, though engagement has been shown to be a major  
520 driver of neural entrainment during film viewing (Dmochowski et al., 2014).

521         There was also a trend for higher neural entrainment to music with subjectively “easy-to-  
522 tap-to” beats. However, both neural entrainment and ease of beat tapping were highest for  
523 slow stimulation tempi; faster songs were associated with weaker entrainment and were rated  
524 as more difficult to tap to. Thus, in the current study, it is not possible to separate the

525 influences of stimulation tempo and beat salience on neural entrainment. Here, we chose  
526 music stimuli with salient, easy-to-perceive beats. However, a design including more “weakly  
527 metrical” or syncopated rhythms may have more success in doing so. Overall, we interpret  
528 our results as indicating that stronger neural entrainment is evoked in response to music that is  
529 more predictable: familiar music and with easy-to-track beat structure.

530 Musical training did not affect the degree of neural entrainment in response to tempo-  
531 modulated music (Supplementary Fig. 6). This contrasts with previous music research  
532 showing that musicians’ neural activity was entrained more strongly by music than non-  
533 musicians’ (Madsen et al., 2019, Doelling and Poeppel, 2015, Di Liberto et al., 2020). There  
534 are several possible reasons for this discrepancy. One is that our study recruited participants  
535 with varying level of musical expertise and did not aim for a specific target group; our study  
536 was not intended to examine the role of musical training in neural entrainment. Furthermore,  
537 most studies that have done so have focused on classical music (Doelling and Poeppel, 2015,  
538 Madsen et al., 2019, Di Liberto et al., 2020), whereas we incorporated music stimuli with  
539 different instruments and from different genre (e. g. Rock, Pop, Techno, Western, Hip Hop or  
540 Jazz). We suspect that musicians are more likely to be familiar with, in particular, classical  
541 music, and as we have shown that familiarity with the individual piece increases neural  
542 entrainment, these studies may have inadvertently confounded musical training with  
543 familiarity.

544

#### 545 *Neural responses predicted tempo perception*

546 One interesting yet difficult aspect of music, when it comes to studying entrainment, is  
547 that music has metrical structure; that is, there are several levels at which nested periodicities  
548 can be perceived. Here, we asked participants to tap along with short sections of each musical  
549 stimulus so that we could confirm that their perceived (tapped) beat rate matched our intended  
550 stimulation tempo. Although participants mostly tapped at the rate we intended, they

551 sometimes tapped at half or double the intended stimulation tempo, especially when the  
552 stimulation tempo was particularly fast or slow, respectively. Here, we applied a classification  
553 approach to demonstrate that entrained neural responses to music can predict a) whether  
554 participants tapped at double-time or half-time to stimuli with the same stimulation tempo, or  
555 b) whether stimuli to which participants tapped identically belonged to the double-time or  
556 half-time stimulation-tempo condition. Importantly, neural activity was measured in response  
557 to auditory stimulation (without movement) and the perceived metrical level was based on the  
558 beat tapping rate established in a separate part of each trial after the listening portion was  
559 over. To our knowledge, this study constitutes the first to successfully identify the specific  
560 metrical level at which individuals perceived a beat in the absence of overt movement.  
561 Nonetheless, there are a few caveats to mention. First, we chose musical stimuli that all had a  
562 relatively easy-to-perceive beat. As a result, only 11 participants had enough trials with  
563 metrically ambiguous tapping behaviour to stimuli belonging to the same intended stimulation  
564 tempo condition for conducting TRF analysis. Moreover, we initially only included the beat-  
565 tapping section of each trial as a verification of the validity of our tempo manipulation. As  
566 such, we only collected tapping responses for 5.5 s per trial, and tapping behavior was quite  
567 difficult to analyze due to the short tapping epochs, which resulted in many tapping trials  
568 being discarded.

569

#### 570 *TRF- and RCA-based measures show converging results*

571 In the present study, we used the TRF and RCA analysis approaches to quantify neural  
572 entrainment. Here, we have purposefully avoided the debate about whether these metrics  
573 measure entrainment “in the narrow sense” (Obleser and Kayser, 2019), meaning phase-  
574 locked and (mainly) unidirectional coupling between a rhythmic input and neural activity  
575 generated by a neural oscillator (Lakatos et al., 2019) or whether neural tracking reflects  
576 convolution with an evoked response (Zuk et al., 2021). Here, we prefer to remain agnostic,

577 and refer rather to “entrainment in the broad sense” (Obleser and Kayser, 2019), that is neural  
578 tracking of music independent of the underlying physiological mechanism.

579 RCA and TRF approaches share their ability to characterize neural responses to single-  
580 trial, ongoing, naturalistic stimuli. As such, both techniques afford something that is  
581 challenging or impossible to accomplish with “classic” ERP analysis. However, we made use  
582 of two techniques in parallel in order to leverage their unique advantages. RCA allows for  
583 frequency-domain analysis such as SRCoh, which can be useful for identifying neural  
584 tracking responses specifically at the beat rate, for example. Past music studies often used a  
585 “frequency-tagging” approach for this, which is based on averaging over trials in the time  
586 domain (so requires repetition of stimuli) rather than relating the neural response to the  
587 stimulus time course, and moreover operates in electrode as opposed to component space  
588 (Nozaradan et al., 2012, Nozaradan et al., 2011). TRFs rather take into account wider-band  
589 neural data, which may better capture the tracking of nested metrical structure as in music.  
590 Moreover, TRFs offer a univariate and multivariate analysis approach that allowed us to show  
591 that adding other musical features to the model did not improve the correspondence to the  
592 neural data over and above spectral flux alone. Despite their differences, we found strong  
593 correspondence between the dependent variables from the two approaches. Specifically, TRF  
594 correlations were strongly correlated with stimulation-tempo SRCoh, and this correlation was  
595 higher than for SRCoh at the first harmonic of the stimulation tempo for the amplitude  
596 envelope, derivative and beat onsets (Supplementary Fig. 5). Thus, despite being computed on  
597 a relatively broad range of frequencies, the TRF seems to be correlate with frequency-specific  
598 measures at the stimulation tempo.

599

## 600 *Conclusions*

601 This study presented new insights into neural entrainment to natural music. We compared  
602 neural entrainment to different musical features and showed strongest neural responses to the

603 spectral flux. This has important implications for research on neural entrainment to music  
604 research, which has so far often quantified stimulus rhythm with what we would argue is a  
605 subpar acoustic feature – the amplitude envelope. Moreover, our findings demonstrate that  
606 neural entrainment is strongest for slower beat rates, and for predictable stimuli, namely  
607 familiar music with an easy-to-perceive beat.  
608

## 609 **Materials and Methods**

### 610 *Participants*

611 Thirty-seven participants completed the study (26 female, 11 male, mean age = 25.7 years,  
612 SD = 4.33 years, age range = 19-36 years); data for 36 were included in the final analysis (see  
613 *EEG data preprocessing*). The sample-sizes for all projects funded by the ERC Starting Grant  
614 (ERC-STG-804029 BRAINSYNC) were pre-calculated with 24 + 4 individuals for between  
615 condition- comparisons experiments and with 32 + 4 individuals for built-in correlational  
616 experiments to obtain 80% power for a significant medium-sized effect while allowing to  
617 discard ~ 15% of the recorded data (G\*Power3). Since the current experiment was designed  
618 to have both types of comparisons, we defaulted to the larger sample size. Prior to the EEG  
619 experiment, all participants filled out an online survey about their demographic and musical  
620 background using LimeSurvey (LimeSurvey GmbH, Hamburg, Germany,  
621 <http://www.limesurvey.org>). All participants self-identified as German speakers. Most  
622 participants self-reported normal hearing (7 participants reported occasional ringing in one or  
623 both ears). Thirty-four participants were right- and three were left-handed. Seventeen  
624 participants reported having no musical background (0-2 years of daily music training, here  
625 termed as “non-musicians”) and 14 reported at least 6 years of musical training (“musicians”).  
626 Musical expertise was assessed using the Goldsmith Music Sophistication Index (Gold-  
627 MSI;(Müllensiefen et al., 2014)). Participants received financial compensation for  
628 participating (Online: 2.50 €, EEG: 7€ per 30 min). All participants signed the informed  
629 consent before starting the experiment. The study was approved by the Ethics Council of the  
630 Max Planck Society Ethics Council in compliance with the Declaration of Helsinki.

631

### 632 *Stimuli*

633 The stimulus set started from 39 instrumental versions of musical pieces from different  
634 genres, including techno, rock, blues, and hip-hop. The musical pieces were available in a

635 \*.wav format on Qobuz Downloadstore (<https://www.qobuz.com/de-de/shop>). Each musical  
636 piece was segmented manually using Audacity (Version 2.3.3, Audacity Team,  
637 <https://www.audacityteam.org>) at musical phrase boundaries (e.g., between chorus and verse),  
638 leading to a pool of 93 musical segments with varying lengths between 14.4 – 38 s. We did  
639 not use the beat count from any publicly available beat-tracking softwares, because they did  
640 not track beats reliably across genres. Due to the first Covid-19 lockdown, we assessed the  
641 original tempo of each musical segment using an online method. Eight tappers, including the  
642 authors, listened to and tapped to each segment on their computer keyboard for a minimum of  
643 17 taps; the tempo was recorded using an online BPM estimation tool  
644 (<https://www.all8.com/tools/bpm.htm>). In order to select stimuli with unambiguous strong  
645 beats that are easy to tap to, we excluded 21 segments due to high variability in tapped  
646 metrical levels (if more than 2 tappers tapped different from the others) or bad sound quality.

647         The remaining 72 segments were then tempo-manipulated using a custom-written  
648 MAX patch (Max 8.1.0, Cycling '74, San Francisco, CA, USA). Each segment was shifted to  
649 tempi between 1–4 Hz in steps of 0.25 Hz. Subsequently, the authors screened all of the  
650 tempo-shifted music and eliminated versions where the tempo manipulation led to acoustic  
651 distortions, made individual notes indistinguishable, or excessively repetitive. Overall, 703  
652 music stimuli with durations of 8.3–56.6 sec remained. All stimuli had a sampling rate of  
653 44,100 Hz, were converted from stereo to mono, linearly ramped with 500-ms fade-in and  
654 fade-out and root-mean-square normalized using Matlab (R2018a; The MathWorks, Natick,  
655 MA, USA). A full overview of the stimulus segments can be found in the Supplementary  
656 Material (Supplementary Table 1).

657         Each participant was assigned to one of four pseudo-randomly generated stimulus  
658 lists. Each list comprised 4–4.6 min of musical stimulation per tempo condition (Kaneshiro et  
659 al., 2020), resulting in 7–17 different musical segments per tempo and a total of 159–162  
660 segments (trials) per participant. Each segment was repeated only once per tempo but was



661 allowed to occur for up to three times at different tempi within one experimental session  
662 (tempo difference between two presentations of the same segment was 0.5 Hz minimum). The  
663 presentation order of the musical segment was randomly generated for each participant prior  
664 to the experiment. The music stimuli were played at 50 dB sensation level (SL), based on  
665 individual hearing thresholds that were determined using the method of limits (Leek, 2001).

666

### 667 *Experimental design*

668 After attaching the EEG electrodes and seating the participant in an acoustically and  
669 electrically shielded booth, the participant was asked to follow the instructions on the  
670 computer screen (BenQ Monitor XL2420Z, 144Hz, 24", 1920x1080, Windows 7 Pro (64-  
671 bit)). The auditory and visual stimulus presentation was achieved using custom-written  
672 Matlab scripts using Psychtoolbox (PTB-3, (Brainard, 1997)) in Matlab (R2017a; The  
673 MathWorks, Natick, MA, USA).

674 The overall experimental flow for each participant can be found in Figure 1A. First,  
675 each participant conducted a self-paced spontaneous motor tempo task (SMT; (Fraisse, 1982))  
676 which is a commonly used technique to assess individual's preferred tapping rate (Rimoldi,  
677 1951, McAuley, 2010). To obtain SMT, each participant tapped for thirty seconds (3  
678 repetitions) at a comfortable rate with a finger on the table close to a contact microphone  
679 (Oyster S/P 1605, Schaller GmbH, Postbauer-Heng, Germany). Second, we estimated  
680 individual's hearing threshold using the method of limits. All sounds in this study were  
681 delivered by a Fireface soundcard (RME Fireface UCX Audiointerface, Audio AG,  
682 Haimhausen, Germany) via on-ear headphones (Beyerdynamics DT-770 Pro, Beyerdynamic  
683 GmbH & Co. KG, Heilbronn, Germany). After a short three-trial training, the main task was  
684 performed. The music stimuli in the main task were grouped into eight blocks with  
685 approximately 20 trials per block and the possibility to take a break in between.

686 Each trial comprised two parts: attentive listening (music stimulation without  
687 movement) and tapping (music stimulation + finger tapping; Fig. 1A). During attentive  
688 listening, one music stimulus was presented (8.3–56.6 s) while the participant looked at a  
689 fixation cross on the screen; the participant was instructed to mentally locate the beat without  
690 moving. Tapping began after a 1-s interval; the last 5.5 s of the previously listened musical  
691 segment were repeated, and participants were instructed to tap a finger to the beat of the  
692 musical segment (as indicated by the replacement of the fixation cross by a hand on the  
693 computer screen). Note that 5.5 s of tapping data is not sufficient to conduct standard analyses  
694 of sensorimotor synchronization; rather, our goal was to confirm that the participants tapped  
695 at the intended beat rate based on our tempo manipulation. After each trial, participants were  
696 asked to rate the segment based on *enjoyment/pleasure, familiarity and ease of tapping to the*  
697 *beat* with the computer mouse on a visual analogue scale ranging from -100 to +100. At the  
698 end of the experiment, the participant performed the SMT task again for three repetitions.

699

#### 700 *EEG data acquisition*

701 EEG data were acquired using BrainVision Recorder (v.1.21.0303, Brain Products GmbH,  
702 Gilching, Germany) and a Brain Products actiCap system with 32 active electrodes attached  
703 to an elastic cap based on the international 10-20 location system (actiCAP 64Ch Standard-2  
704 Layout Ch1-32, Brain Products GmbH, Gilching, Germany). The signal was referenced to the  
705 FCz electrode and grounded at the AFz position. Electrode impedances were kept below 10  
706 kOhm. The brain activity was acquired using a sampling rate of 1000 Hz via a BrainAmp DC  
707 amplifier (BrainAmp ExG, Brain Products GmbH, Gilching, Germany). To ensure correct  
708 timing between the recorded EEG data and the auditory stimulation, a TTL trigger pulse over  
709 a parallel port was sent at the onset and offset of each musical segment and the stimulus  
710 envelope was recorded to an additional channel using a StimTrak (StimTrak, Brain Products  
711 GmbH, Gilching, Germany).

712

713 *Data Analysis*

714 *Behavioral data.* Tapping data was processed offline with a custom-written Matlab script. To  
715 extract the taps, the \*.wav files were imported and downsampled (from 44.1 kHz to 2205 Hz).  
716 The threshold for extracting the taps was adjusted for each trial manually (SMT and music  
717 tapping) and trials with irregular tap intervals were rejected. The SMT results were not  
718 analyzed as part of this study and will not be discussed further. For the music tapping, only  
719 trials with at least three taps (two intervals) were included for further analysis. Five  
720 participants were excluded from the music tapping analysis due to irregular and inconsistent  
721 taps within a trial (if > 40% of the trials were excluded).

722         One of our goals was to test whether we could identify trials based on the neural data  
723 where the perceived tempo differed from the intended stimulation rate (see *Brain responses to*  
724 *musical features can predict the produced beat tapping rate*). For this analysis, we identified  
725 two subsets of participants: those that tapped the same tempo to two sets of stimuli with  
726 different intended stimulation tempi, and those that tapped the intended stimulation tempo on  
727 some trials and a different tempo than what was intended (the harmonic or subharmonic) on  
728 other trials. We identified 19 participants that tapped for at least 6 trials at the intended  
729 stimulation tempo and tapped for at least 6 trials at the same tempo when the stimulation  
730 tempo was something different (double the tapped tempo; i.e., participants tapped at half the  
731 intended stimulation tempo). In contrast, we identified 11 participants that tapped for at least  
732 6 trials at the intended stimulation tempo and for at least 6 trials at half-/double the  
733 stimulation tempo. TRFs were submitted to a SVM classifier (see section *EEG – Temporal*  
734 *Response Function*).

735         On each trial, participants were asked to rate the musical segments based on  
736 *enjoyment/pleasure, familiarity and ease to tap to the beat*. The rating scores were normalized  
737 to the maximum absolute rating per participant and per category. For the group analysis the

738 mean and standard error of the mean (SEM) were calculated. For assessing the effects of each  
739 subjective dimension on neural entrainment, the 15 trials with the highest and lowest ratings  
740 (regardless of the tempo) per participant were further analyzed (see *EEG – Temporal*  
741 *Response Function*).

742

743 *Audio Analysis*. We assessed neural entrainment to four different musical features (Fig. 1B-  
744 C). Note that the term “musical feature” is used to describe time-varying features of music  
745 that operate on a similar time-scale as neural entrainment as opposed to the classical musical  
746 elements such as syncopation or harmony; 1) Amplitude envelope – gammatone filtered  
747 amplitude envelope in the main manuscript and absolute value of the full-band Hilbert  
748 envelope in the Supplementary Material; the gammatone filterbank consisted of 128 channels  
749 linearly spaced between 60-6000 Hz. 2) Half-wave rectified, first derivative of the amplitude  
750 envelope, which detects energy changes over time and is typically more sensitive to onsets  
751 (Daube et al., 2019, Di Liberto et al., 2020). 3) Binary-coded beat onsets (0= no beat; 1=beat);  
752 a professionally trained percussionist tapped with a wooden drumstick on a MIDI drum pad to  
753 the beat of each musical segment at the original tempo (3 trials per piece). After latency  
754 correction, the final beat times were taken as the average of the two takes with the smallest  
755 difference (Harrison and Müllensiefen, 2018). 4) Spectral novelty (“spectral flux”) (Miller,  
756 2015) was computed using a custom-written Python script (Python 3.6, Spyder 4.2.0) using  
757 the packages *numpy* and *librosa*. For computing the spectral flux of each sound, the  
758 spectrogram across frequencies of consecutive frames (frame length = 344 samples) was  
759 compared. All stimulus features were z-scored and downsampled to 128 Hz for computing the  
760 stimulus-brain synchrony.

761 To validate that each musical feature contained acoustic cues to our tempo  
762 manipulation, we conducted a discrete Fourier transform using a Hamming window on each

763 musical segment (resulting frequency resolution of 0.0025 Hz), averaged and z-scored the  
764 amplitude spectra per tempo and per musical feature (Fig. 1C).

765 To assess how much information the different musical features share, a mutual  
766 information (MI) score was computed between each pair of musical features (Fig. 1D). MI (in  
767 bits) is a time-sensitive measure that quantifies the reduction of uncertainty for one variable  
768 after observing a second variable (Cover and Thomas, 2005). MI was computed using  
769 *quickMI* from the Neuroscience Information Theory Toolbox with 4 bins, no delay, and a p-  
770 value cut-off of 0.001 (Timme and Lapish, 2018). For each stimulus feature, all trials were  
771 concatenated in the same order for each tempo condition and stimulation subgroup (Time x 13  
772 Tempi x 4 Subgroups). MI values for pairs of musical features were compared to surrogate  
773 datasets in which one musical feature was time reversed (Fig. 1D). To statistically assess the  
774 shared information between musical features, a three-way ANOVA test was performed (with  
775 first factor: data-surrogate comparison; second factor: tempo and third factor: stimulation  
776 subgroup).

777

778 *EEG data preprocessing.* Unless stated otherwise, all EEG data were analyzed offline using  
779 custom-written Matlab code (R2019b; The MathWorks, Natick, MA, USA) combined with  
780 the Fieldtrip toolbox (Oostenveld et al., 2011). The continuous EEG data were bandpass  
781 filtered between 0.5-30 Hz (Butterworth filter), re-referenced to the average reference,  
782 downsampled to 500 Hz, and epoched between 1 s after stimulus onset (to remove onset  
783 responses to the start of the music stimulus) until the end of the initial musical segment  
784 presentation (attentive listening part of the trial). Single trials and channels containing large  
785 artefacts were removed based on an initial visual inspection. Missing channels were  
786 interpolated based on neighbouring channels with a maximum distance of 3 cm  
787 (*ft\_prepare\_neighbours*). Subsequently, Independent Component Analysis (ICA) was applied  
788 to remove artefacts and eye movements semi-automatically. After transforming the data back

789 from component to electrode space, electrodes that exceeded 4 standard deviations of the  
790 mean (of the squared data) for at least 10% of the recording time were excluded. If bad  
791 electrodes were identified, pre-processing for that recording was repeated after removing the  
792 identified electrode (Kaneshiro et al., 2020). Next, noisy segments of the single-trial, single-  
793 electrode recordings were rejected. For the RCA analysis, the data points were replaced by  
794 NaNs when the segment exceeded a threshold of two standard deviations of the single-trial,  
795 single-electrode mean amplitude. For the TRF analysis, which does not operate on NaNs,  
796 noisy transients were replaced by estimates using spherical spline interpolation with a pre-  
797 and post- window length of 0.5 s. This step was repeated four times to ensure that all artefacts  
798 were removed (Kaneshiro et al., 2020). The dataset of one participant was discarded because  
799 of large artefacts in the EEG signal and for not following the experimental instructions. The  
800 behavioral and neural data of the remaining 36 participants were utilized for further analysis.

801 Next, the data were restructured to match the requirements of the RCA or TRF (see  
802 sections *EEG – Temporal Response Function* and *EEG – Reliable Component Analysis*),  
803 downsampled to 128 Hz and z-scored. For the RCA analysis approach, the trials in each  
804 tempo condition were concatenated resulting in a time-by-electrode matrix (Time x 33  
805 Electrodes; with Time varying across tempo condition). Subsequently the data of participants  
806 in the same subgroup were pooled together in a time-by-electrode-by-participant matrix (Time  
807 x 33 Electrodes x 9 or 10 Participants depending on the subgroup). In contrast to the RCA, for  
808 TRF analysis, trials in the same stimulation condition were not concatenated in time, but  
809 grouped into cell arrays per participant according to the stimulus condition (Tempo x Trials x  
810 Electrodes x Time).

811  
812 *EEG – Reliable Component Analysis*. To reduce data dimensionality and enhance the signal-  
813 to-noise ratio, we performed RCA (reliable components analysis, also correlated components  
814 analysis) (Dmochowski et al., 2012). RCA is designed to capture the maximum correlation

815 between datasets of different participants by combining electrodes linearly into a vector space.  
816 One important feature of this technique is that it maximizes the correlation between electrodes  
817 across participants (which differentiates it from the similar canonical correlation analysis)  
818 (Madsen et al., 2019). Using the *rcaRun* Matlab function (Dmochowski et al., 2012,  
819 Kaneshiro et al., 2020), the time-by-electrode matrix was transformed to a time-by-  
820 component matrix with the maximum across-trial correlation in the first reliable component  
821 (RC1), followed by components with correlation values in descending order. For each RCA  
822 calculation, for each tempo condition and subgroup, the first three RCs were retained,  
823 together with forward-model projections for visualizing the scalp topographies. The next  
824 analysis steps in the time and frequency-domain were conducted on the maximally correlated  
825 RC1 component.

826 To examine the correlation between the neural signal and stimulus over time, the  
827 stimulus-response correlation (SRCorr) was calculated for every musical feature. This  
828 analysis procedure was adopted from (Kaneshiro et al., 2020). In brief, every stimulus feature  
829 was concatenated in time with trials of the same tempo condition and subgroup to match the  
830 neural component-by-time matrix. The stimulus features were temporally filtered to account  
831 for the stimulus–brain time lag, and the stimulus features and neural time-courses were  
832 correlated. To create a temporal filter, every stimulus feature was transformed into a Toeplitz  
833 matrix, where every column repeats the stimulus-feature time course, shifted by one sample  
834 up to a maximum shift of 1 s, plus an additional intercept column. The Moore-Penrose  
835 pseudoinverse of the Toeplitz matrix and temporal filter was used to calculate the SRCorr. To  
836 report the SRCorr, the mean ( $\pm$  SEM) correlation coefficient across tempo conditions for  
837 every stimulus feature was calculated. For comparing tempo-specificity between musical  
838 features, a linear regression was fit to SRCorr values (and TRF correlations) as a function of  
839 tempo for every participant and for every musical feature (using *fitlm*). We compared the  
840 resulting slopes across musical features with a one-way ANOVA

841 Stimulus-response coherence (SRCoh) is a measure that quantifies the consistency of  
842 phase and amplitude of two signals in a specific frequency band and ranges from 0 (no  
843 coherence) to 1 (perfect coherence) (Srinivasan et al., 2007). Here, the magnitude-squared  
844 coherence between different stimulus features and neural data was computed using the  
845 function *mscohere* with a Hamming window of 5 s and 50% overlap, resulting in a frequency  
846 range 0–64 Hz with a 0.125 Hz resolution. For visualizing the mean frequency response per  
847 musical feature, the coherence values at each stimulation tempo were normalized by dividing  
848 by the mean coherence across all other stimulation tempi per frequency bin (Fig. 2E-H) (van  
849 Bree et al., 2021). As strong coherence was found at the stimulation tempo and the first  
850 harmonic, the SRCoh values of each frequency vector were compared between musical  
851 features.

852

853 *EEG – Temporal Response Function.* The TRF is a system identification technique, which  
854 computes a filter that optimally describes the relationship between the brain response and  
855 stimulus features (Ding and Simon, 2012, Crosse et al., 2016). Via linear convolution, the  
856 filter delineates how the stimulus features map onto the neural response (forward model),  
857 using ridge regression to avoid overfitting. All computations of the TRF used the Matlab  
858 toolbox “The multivariate Temporal Response Function (mTRF) Toolbox” (Crosse et al.,  
859 2016). The TRF was calculated in a leave-one-out cross-validation manner for all trials per  
860 stimulation tempo; this procedure was repeated for each musical feature separately, and  
861 additionally for all musical features together in a multivariate model (using *mTRFcrossval*  
862 and *mTRFtrain*) using time lags 0–400 ms (Di Liberto et al., 2020). Using *mTRFpredict*, the  
863 neural time course of the left-out trial was predicted based on the time course of the  
864 corresponding musical feature of that trial. The quality of the predicted neural data was  
865 assessed by computing Pearson correlations between the predicted and actual EEG data  
866 separately for each electrode (TRF correlations). We averaged over the eight electrodes with



867 the highest TRF correlations that also corresponded to a canonical auditory topography. To  
868 quantify differences in the TRFs, the mean TRF correlation across stimulation tempo and/or  
869 musical feature was calculated per participant. The TRF weights across time lags were Fisher-  
870 z-scored (Fig. 3C-F) (Crosse et al., 2016).

871 The assessment of TRF weights across time lags was accomplished by using a  
872 clustering approach for each musical feature and comparing significant data clusters to  
873 clusters from a random distribution (Fig. 3C-F). To extract significant time windows in which  
874 the TRF weights were able to differentiate the different tempo conditions, a one-way ANOVA  
875 was performed at each time point. Clusters (consecutive time windows) were identified if the  
876 p-value was below a significance level of 0.05 and the size and F-statistic of those clusters  
877 were retained. Next, the clusters were compared to a surrogate dataset, which followed the  
878 same procedure, but had the labels of the tempo conditions randomly shuffled before entering  
879 it to the ANOVA. This step was repeated for 1000 times (permutation testing). At the end, the  
880 significance of clusters was evaluated by subtracting the proportion of times the summed F-  
881 values of each clusters exceeded the summed F-values of the surrogate clusters from 1. A p-  
882 value below 0.05 was considered significant (Fig. 3G-I). This approach yielded significant  
883 regions for the full-band (Hilbert) envelope and derivative (Supplementary Fig. 4). As these  
884 clusters did not show differences across amplitudes but rather in time, a latency analysis was  
885 conducted. Therefore, local minima around the grand average minimum within the significant  
886 time lag window were identified for every participant/tempo condition and the latencies  
887 retained. As there was no significant correlation between latencies and tempo conditions, the  
888 stimulation tempi were split upon visual inspection into two groups (1-2.5 Hz and 2.75-4 Hz).  
889 Subsequently, a piecewise linear regression was fitted to the data and the root mean square  
890 error (RMSE) and p-value calculated (Supplementary Fig. 4G, K).

891 TRFs were evaluated based on participant ratings of enjoyment, familiarity, and ease  
892 to tap to the beat. Two TRFs were calculated per participant based on the 15 highest and 15

893 lowest ratings on each measure (ignoring tempo condition and subgroup), and the TRF  
894 correlations and time lags were compared between the two groups of trials (Fig. 5).  
895 Significant differences between the groups were evaluated based on paired-sample t-tests.

896 The effect of musical sophistication was analyzed by computing the Pearson  
897 correlation coefficients between the maximum TRF correlation across tempi per participant  
898 and the general musical sophistication (Gold-MSI) per participant (Supplementary Fig. 6).

899 A support vector machine (SVM) classifier tested whether TRFs captured information  
900 about the intended stimulation tempo, the perceived beat rate, or both (Fig. 6). As described  
901 previously (see *Behavioral Analysis*), individual tempo conditions were identified in which  
902 participants tapped the same rate for two sets of trials that had different intended stimulation  
903 tempi, and conditions were also identified in which participants tapped two different rates in  
904 response to the same intended stimulation tempo. TRF analysis was performed separately for  
905 those two groups of trials, and the z-scored TRF weights were fed into the SVM classifier.  
906 First, the SVM classifier was trained to predict the stimulation tempo based on the TRF  
907 weights for trials on which the stimulation tempo corresponded to the tapped rate versus trials  
908 when the same tapped rate was twice the stimulation tempo (tapped rate = intended  
909 stimulation tempo vs. same tapped rate = 2\*stimulation tempo; n=19). In comparison, we next  
910 identified participants that tapped for 6 trials at the intended tempo and for 6 trials at the  
911 harmonic of that intended tempo (intended stimulation tempo = tapped rate vs. same  
912 stimulation tempo = 2\*tapped rate, n=13). The resulting TRFs were used to predict the tapped  
913 rate of the participants. Overall, the classifier was trained to find the optimal hyperplane that  
914 separates the data (*fitsvm*) and was validated in with a leave-one-out cross-validation method  
915 (*crossval*). Classification error (quantified with *kfoldLoss*) was compared to a surrogate  
916 condition in which the labels of the classifier were randomly shuffled during the training step.  
917 The SVM was computed for 100 iterations of the surrogate data. An SVM-accuracy metric  
918 was quantified as:

$$919 \quad \frac{\text{Data Accuracy} - \text{Surrogate Accuracy}}{\text{Data Accuracy} + \text{Surrogate Accuracy}} \quad (1)$$

920 leading to a matrix of 4 Musical Features x 13 or 19 Tempo conditions x 100 SVM  
921 repetitions.

922

923 *EEG – Comparison of TRF and RCA measures.* The relationship between the TRF analysis  
924 approach and the SRCorr was calculated using a linear-mixed effects model (using *fitlme*).  
925 Participant and tempo were random (grouping) effects; SRCorr the fixed (predictor) effect  
926 and TRF correlations the response variable. To examine the underlying model assumption, the  
927 residuals of the linear-mixed effects model were plotted and checked for consistency. The  
928 best predictors of the random effects and the fixed-effects coefficients (beta) were computed  
929 for every musical feature and illustrated as violin plot (Fig. 4).

930

931 *Statistical Analysis.*

932 For each analysis, we assessed the overall difference between multiple subgroups  
933 using a one-way ANOVA. To test for significant differences across tempo conditions and  
934 musical features (TRF Correlation, SRCorr and SRCoh), repeated-measure ANOVAs were  
935 conducted coupled to Tukey's test and Greenhouse-Geiser correction was applied when the  
936 assumption of sphericity was violated (as calculated with the Mauchly's test). As effect size  
937 measures, we report partial  $\eta^2$  for repeated-measures ANOVAs and  $r_{\text{equivalent}}$  for paired sample  
938 t-test (Rosenthal and Rubin, 2003). Where applicable, the p-values were corrected using the  
939 False Discovery Rate (FDR).

940

## 941 **Acknowledgments**

942 This work was funded by the ERC Starting Grant awarded to Molly Henry (ERC-STG-  
943 804029 BRAINSYNC). We would like to thank the lab staff of the Max Planck Institute for

944 Empirical Aesthetics for technical support during data acquisition and Lauren Fink for  
945 valuable input during data analysis and stimulus feature design.

946

#### 947 **Author Contributions**

948 **KW**: Conceptualization, Methodology, Software, Investigation, Formal Analysis,  
949 Visualization, Writing - Original draft preparation. **OXW**: Software. Writing - Reviewing and  
950 Editing. **MJH**: Conceptualization, Methodology, Software, Formal Analysis, Supervision,  
951 Writing - Original draft preparation, Writing- Reviewing and Editing, Funding acquisition.

952

#### 953 **Competing financial interests**

954 There are no competing financial interests in relation to the work described in this manuscript.

955

#### 956 **References**

- 957 BAUER, A.-K. R., KREUTZ, G. & HERRMANN, C. S. 2015. Individual musical tempo  
958 preference correlates with EEG beta rhythm. *Psychophysiology*, 52, 600-604.
- 959 BELLO, J. P., DAUDET, L., ABDALLAH, S., DUXBURY, C., DAVIES, M. & SANDLER,  
960 M. B. 2005. A tutorial on onset detection in music signals. *IEEE Transactions on*  
961 *Speech and Audio Processing*, 13, 1035-1047.
- 962 BRAINARD, D. H. 1997. The Psychophysics Toolbox. *Spatial Vision*, 10, 433-436.
- 963 BRODERICK, M. P., ANDERSON, A. J. & LALOR, E. C. 2019. Semantic Context  
964 Enhances the Early Auditory Encoding of Natural Speech. *The Journal of*  
965 *Neuroscience*, 39, 7564.
- 966 BURGER, B., LONDON, J., THOMPSON, M. R. & TOIVAINEN, P. 2018.  
967 Synchronization to metrical levels in music depends on low-frequency spectral  
968 components and tempo. *Psychological Research*, 82, 1195-1211.
- 969 CAMERON, D. J., ZIOGA, I., LINDSEN, J. P., PEARCE, M. T., WIGGINS, G. A.,  
970 POTTER, K. & BHATTACHARYA, J. 2019. Neural entrainment is associated with  
971 subjective groove and complexity for performed but not mechanical musical rhythms.  
972 *Experimental Brain Research*, 237, 1981-1991.
- 973 CHEN, J. L., PENHUNE, V. B. & ZATORRE, R. J. 2008. Listening to musical rhythms  
974 recruits motor regions of the brain. *Cereb Cortex*, 18, 2844-54.
- 975 COVER, T. & THOMAS, J. 2005. Entropy, Relative Entropy, and Mutual Information.
- 976 CROSSE, M. J., DI LIBERTO, G. M., BEDNAR, A. & LALOR, E. C. 2016. The  
977 Multivariate Temporal Response Function (mTRF) Toolbox: A MATLAB Toolbox  
978 for Relating Neural Signals to Continuous Stimuli. *Frontiers in Human Neuroscience*,  
979 10.

- 980 DAUBE, C., INCE, R. A. A. & GROSS, J. 2019. Simple Acoustic Features Can Explain  
981 Phoneme-Based Predictions of Cortical Responses to Speech. *Current Biology*, 29,  
982 1924-1937.e9.
- 983 DECRUY, L., VANTHORNHOUT, J. & FRANCAERT, T. 2019. Evidence for enhanced  
984 neural tracking of the speech envelope underlying age-related speech-in-noise  
985 difficulties. *Journal of Neurophysiology*, 122, 601-615.
- 986 DI LIBERTO, G. M., PELOFI, C., BIANCO, R., PATEL, P., MEHTA, A. D., HERRERO, J.  
987 L., DE CHEVEIGNÉ, A., SHAMMA, S. & MESGARANI, N. 2020. Cortical  
988 encoding of melodic expectations in human temporal cortex. *eLife*, 9, e51784.
- 989 DING, N., PATEL, A. D., CHEN, L., BUTLER, H., LUO, C. & POEPEL, D. 2017.  
990 Temporal modulations in speech and music. *Neuroscience & Biobehavioral Reviews*,  
991 41, 181-187.
- 992 DING, N. & SIMON, J. Z. 2012. Neural coding of continuous speech in auditory cortex  
993 during monaural and dichotic listening. *Journal of Neurophysiology*, 107, 78-89.
- 994 DMOCHOWSKI, J. P., BEZDEK, M. A., ABELSON, B. P., JOHNSON, J. S.,  
995 SCHUMACHER, E. H. & PARRA, L. C. 2014. Audience preferences are predicted by  
996 temporal reliability of neural processing. *Nature Communications*, 5, 4567.
- 997 DMOCHOWSKI, J. P., SAJDA, P., DIAS, J. & PARRA, L. C. 2012. Correlated components  
998 of ongoing EEG point to emotionally laden attention - a possible marker of  
999 engagement? *Frontiers in human neuroscience*, 6, 112-112.
- 1000 DOELLING, K. B., ARNAL, L. H., GHITZA, O. & POEPEL, D. 2014. Acoustic landmarks  
1001 drive delta-theta oscillations to enable speech comprehension by facilitating  
1002 perceptual parsing. *NeuroImage*, 85, 761-768.
- 1003 DOELLING, K. B. & POEPEL, D. 2015. Cortical entrainment to music and its modulation  
1004 by expertise. *Proceedings of the National Academy of Sciences*, 112, E6233.
- 1005 FRAISSE, P. 1982. 6 - Rhythm and Tempo. In: DEUTSCH, D. (ed.) *Psychology of Music*.  
1006 San Diego: Academic Press.
- 1007 GIRAUD, A.-L. & POEPEL, D. 2012. Cortical oscillations and speech processing: emerging  
1008 computational principles and operations. *Nature Neuroscience*, 15, 511-517.
- 1009 GRAHN, J. A. & BRETT, M. 2007. Rhythm and Beat Perception in Motor Areas of the  
1010 Brain. *Journal of Cognitive Neuroscience*, 19, 893-906.
- 1011 GUNDLACH, C., MÜLLER, M. M., NIERHAUS, T., VILLRINGER, A. & SEHM, B. 2016.  
1012 Phasic Modulation of Human Somatosensory Perception by Transcranially Applied  
1013 Oscillating Currents. *Brain Stimulation*, 9, 712-719.
- 1014 HARRISON, P. M. C. & MÜLLENSIEFEN, D. 2018. Development and Validation of the  
1015 Computerised Adaptive Beat Alignment Test (CA-BAT). *Scientific Reports*, 8, 12395.
- 1016 HENRY, M. J. & HERRMANN, B. 2014. Low-Frequency Neural Oscillations Support  
1017 Dynamic Attending in Temporal Context. *Timing & Time Perception*, 2, 62-86.
- 1018 HENRY, M. J. & OBLESER, J. 2012. Frequency modulation entrains slow neural oscillations  
1019 and optimizes human listening behavior. *Proceedings of the National Academy of  
1020 Sciences*, 109, 20095.
- 1021 KANESHIRO, B., NGUYEN, D. T., NORCIA, A. M., DMOCHOWSKI, J. P. & BERGER, J.  
1022 2020. Natural music evokes correlated EEG responses reflecting temporal structure  
1023 and beat. *NeuroImage*, 214, 116559.
- 1024 KEITEL, C., OBLESER, J., JESSEN, S. & HENRY, M. J. 2021. Frequency-Specific Effects  
1025 in Infant Electroencephalograms Do Not Require Entrained Neural Oscillations: A  
1026 Commentary on Köster et al. (2019). *Psychological Science*, 32, 966-971.
- 1027 KÖSEM, A., BOSKER, H. R., TAKASHIMA, A., MEYER, A., JENSEN, O. & HAGOORT,  
1028 P. 2018. Neural Entrainment Determines the Words We Hear. *Current Biology*, 28,  
1029 2867-2875.e3.

- 1030 KUMAGAI, Y., MATSUI, R. & TANAKA, T. 2018. Music Familiarity Affects EEG  
1031 Entrainment When Little Attention Is Paid. *Front Hum Neurosci*, 12, 444.
- 1032 LAKATOS, P., GROSS, J. & THUT, G. 2019. A New Unifying Account of the Roles of  
1033 Neuronal Entrainment. *Current Biology*, 29, R890-R905.
- 1034 LARGE, E. W. & SNYDER, J. S. 2009. Pulse and meter as neural resonance. *Ann N Y Acad*  
1035 *Sci*, 1169, 46-57.
- 1036 LEEK, M. R. 2001. Adaptive procedures in psychophysical research. *Perception &*  
1037 *Psychophysics*, 63, 1279-1292.
- 1038 MACDOUGALL, H. G. & MOORE, S. T. 2005. Marching to the beat of the same drummer:  
1039 the spontaneous tempo of human locomotion. *J Appl Physiol (1985)*, 99, 1164-73.
- 1040 MADSEN, J., MARGULIS, E. H., SIMCHY-GROSS, R. & PARRA, L. C. 2019. Music  
1041 synchronizes brainwaves across listeners with strong effects of repetition, familiarity  
1042 and training. *Scientific Reports*, 9, 3576.
- 1043 MCAULEY, J. D. 2010. Tempo and rhythm. *Music perception*. New York, NY, US: Springer  
1044 Science + Business Media.
- 1045 MCAULEY, J. D., JONES, M. R., HOLUB, S., JOHNSTON, H. M. & MILLER, N. S. 2006.  
1046 The time of our lives: life span development of timing and event tracking. *J Exp*  
1047 *Psychol Gen*, 135, 348-67.
- 1048 MLLER, M. 2015. *Fundamentals of Music Processing: Audio, Analysis, Algorithms,*  
1049 *Applications*, Springer Publishing Company, Incorporated.
- 1050 MOELANTS, D. Preferred tempo reconsidered. Proceedings of the 7th international  
1051 conference on music perception and cognition, 2002. Citeseer, 1-4.
- 1052 MORILLON, B., SCHROEDER, C. E. & WYART, V. 2014. Motor contributions to the  
1053 temporal precision of auditory attention. *Nature Communications*, 5, 5255.
- 1054 MÜLLENSIEFEN, D., GINGRAS, B., MUSIL, J. & STEWART, L. 2014. The Musicality of  
1055 Non-Musicians: An Index for Assessing Musical Sophistication in the General  
1056 Population. *PLOS ONE*, 9, e89642.
- 1057 NICOLAOU, N., MALIK, A., DALY, I., WEAVER, J., HWANG, F., KIRKE, A., ROESCH,  
1058 E. B., WILLIAMS, D., MIRANDA, E. R. & NASUTO, S. J. 2017. Directed Motor-  
1059 Auditory EEG Connectivity Is Modulated by Music Tempo. *Frontiers in Human*  
1060 *Neuroscience*, 11, 502.
- 1061 NOZARADAN, S., PERETZ, I., MISSAL, M. & MOURAUX, A. 2011. Tagging the  
1062 Neuronal Entrainment to Beat and Meter. *The Journal of Neuroscience*, 31, 10234.
- 1063 NOZARADAN, S., PERETZ, I. & MOURAUX, A. 2012. Selective neuronal entrainment to  
1064 the beat and meter embedded in a musical rhythm. *J Neurosci*, 32, 17572-81.
- 1065 OBLESER, J. & KAYSER, C. 2019. Neural Entrainment and Attentional Selection in the  
1066 Listening Brain. *Trends Cogn Sci*, 23, 913-926.
- 1067 OLIVEIRA, J., GOUYON, F., MARTINS, L. & REIS, L. 2010. *IBT: A Real-time Tempo and*  
1068 *Beat Tracking System*.
- 1069 OOSTENVELD, R., FRIES, P., MARIS, E. & SCHOFFELLEN, J.-M. 2011. FieldTrip: Open  
1070 Source Software for Advanced Analysis of MEG, EEG, and Invasive  
1071 Electrophysiological Data. *Computational Intelligence and Neuroscience*, 2011,  
1072 156869.
- 1073 PARRA, L., HAUFE, S. & DMOCHOWSKI, J. 2018. Correlated Components Analysis ---  
1074 Extracting Reliable Dimensions in Multivariate Data.
- 1075 PATEL, A. D. 2003. Rhythm in language and music: parallels and differences. *Ann N Y Acad*  
1076 *Sci*, 999, 140-3.
- 1077 PEELLE, J. & DAVIS, M. 2012. Neural Oscillations Carry Speech Rhythm through to  
1078 Comprehension. *Frontiers in Psychology*, 3.

- 1079 PEELLE, J. E., GROSS, J. & DAVIS, M. H. 2013. Phase-Locked Responses to Speech in  
1080 Human Auditory Cortex are Enhanced During Comprehension. *Cerebral Cortex*, 23,  
1081 1378-1387.
- 1082 PFORDRESHER, P. Q. 2003. The Role of Melodic and Rhythmic Accents in Musical  
1083 Structure. *Music Perception*, 20, 431-464.
- 1084 REETZKE, R., GNANATEJA, G. N. & CHANDRASEKARAN, B. 2021. Neural tracking of  
1085 the speech envelope is differentially modulated by attention and language experience.  
1086 *Brain and Language*, 213, 104891.
- 1087 RIMOLDI, H. J. 1951. Personal tempo. *J Abnorm Psychol*, 46, 283-303.
- 1088 ROSE, D., CAMERON, D. J., LOVATT, P. J., GRAHN, J. A. & ANNETT, L. E. 2020.  
1089 Comparison of Spontaneous Motor Tempo during Finger Tapping, Toe Tapping and  
1090 Stepping on the Spot in People with and without Parkinson's Disease. *Journal of*  
1091 *movement disorders*, 13, 47-56.
- 1092 ROSENTHAL, R. & RUBIN, D. B. 2003. reequivalent: A simple effect size indicator.  
1093 *Psychological Methods*, 8, 492-496.
- 1094 SHANNON, R. V. 2005. Speech and Music Have Different Requirements for Spectral  
1095 Resolution. *International Review of Neurobiology*. Academic Press.
- 1096 SPAAK, E., DE LANGE, F. P. & JENSEN, O. 2014. Local entrainment of  $\alpha$  oscillations by  
1097 visual stimuli causes cyclic modulation of perception. *J Neurosci*, 34, 3536-44.
- 1098 SRINIVASAN, R., WINTER, W. R., DING, J. & NUNEZ, P. L. 2007. EEG and MEG  
1099 coherence: measures of functional connectivity at distinct spatial scales of neocortical  
1100 dynamics. *Journal of neuroscience methods*, 166, 41-52.
- 1101 TIERNEY, A. & KRAUS, N. 2015. Neural entrainment to the rhythmic structure of music. *J*  
1102 *Cogn Neurosci*, 27, 400-8.
- 1103 TIMME, N. M. & LAPISH, C. 2018. A Tutorial for Information Theory in Neuroscience.  
1104 *eneuro*, 5, ENEURO.0052-18.2018.
- 1105 VAN BREE, S., SOHOGLU, E., DAVIS, M. H. & ZOEFELE, B. 2021. Sustained neural  
1106 rhythms reveal endogenous oscillations supporting speech perception. *PLOS Biology*,  
1107 19, e3001142.
- 1108 VANDEN BOSCH DER NEDERLANDEN, C. M., JOANISSE, M. F. & GRAHN, J. A.  
1109 2020. Music as a scaffold for listening to speech: Better neural phase-locking to song  
1110 than speech. *NeuroImage*, 214, 116767.
- 1111 WOLLMAN, I., ARIAS, P., AUCOUTURIER, J.-J. & MORILLON, B. 2020. Neural  
1112 entrainment to music is sensitive to melodic spectral complexity. *Journal of*  
1113 *Neurophysiology*, 123, 1063-1071.
- 1114 ZALTA, A., PETKOSKI, S. & MORILLON, B. 2020. Natural rhythms of periodic temporal  
1115 attention. *Nature Communications*, 11, 1051.
- 1116 ZATORRE, R. J., BELIN, P. & PENHUNE, V. B. 2002. Structure and function of auditory  
1117 cortex: music and speech. *Trends in Cognitive Sciences*, 6, 37-46.
- 1118 ZUK, N. J., MURPHY, J. W., REILLY, R. B. & LALOR, E. C. 2021. Envelope  
1119 reconstruction of speech and music highlights stronger tracking of speech at low  
1120 frequencies. *PLOS Computational Biology*, 17, e1009358.
- 1121
